# Supplementary material for: The synthesis of imidazo[1,5-a]quinolinesviaa decarboxylative cyclization under metal-free conditions
Source: Royal Society of Chemistry journal article supplement (doi:10.1039/c8ra03786h), 2018-01-01

Electronic Supporting Information

## The synthesis of imidazo[1,5-*a*]quinolines via a decarboxylative cyclization under metal-free condition

Zicong Yan,<sup>a</sup> Changfeng Wan<sup>b</sup>, Yu Yang<sup>a</sup>, Zhenggen Zha\*<sup>a</sup> and Zhiyong Wang\*<sup>a</sup>

<sup>a</sup> Hefei National Laboratory for Physical Sciences at Microscale, CAS Key Laboratory of Soft Matter Chemistry & Center for Excellence in Molecular Synthesis of Chinese Academy of Sciences, Collaborative Innovation Center of Suzhou Nano Science and Technology & School of Chemistry and Materials Science, University of Science and Technology of China, 230026, Hefei, Anhui. P. R. China. E-mail: zwan3@ustc.edu.cn; Fax: (+86) 551-6360-3185.

<sup>b</sup> College of Chemistry and Chemical Engineering, Jiangxi Normal University, 330022, Nanchang, P. R. China. E-mail: wanfeng@jxnu.edu.cn.

Contents:

|                                                                         |    |
|-------------------------------------------------------------------------|----|
| (A) Typical experimental procedure for the synthesis of substrates..... | S2 |
| (B) Copies of NMR spectra for product <b>3</b> .....                    | S3 |

### (A) Typical experimental procedure for the synthesis of substrates

(1) A typical experimental procedure for the synthesis of 2-methyl quinolines:

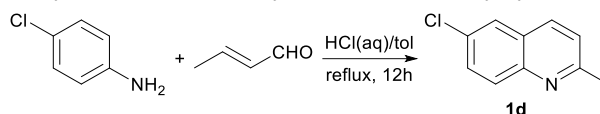

4-Chloro-aniline (2.54g, 20 mmol), 23.2 mL of 37% HCl (aq) and 10 mL of water were added to a 250 mL round-bottom flask. The mixture was stirred at 100 °C for at least 30 minutes. When the solid were all dissolved, crotonaldehyde (1.75g, 25mmol) in 13 mL of toluene was added and the mixture were kept reflux for 12 h. Then the mixture was cooled to room temperature and poured into 100 mL of Na<sub>2</sub>CO<sub>3</sub> (aq). The product was extracted by CH<sub>2</sub>Cl<sub>2</sub> and purified by silica gel column chromatography (PE/EtOAc = 15:1) to afford the desired product **1d** (2.52g, 71%).

(2) Experimental procedure for the synthesis of ethyl quinoline-2-acetate (**1n**):

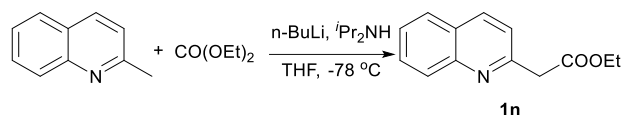

A mixture of 7.08g diisopropylamine (9.8 mL, 70 mmol) and 10 mL of dried THF was added to a three-necked flask by syringe under N<sub>2</sub>. After cooling down to -78 °C, 28.4 mL of *n*-Butyl lithium (2.4M in hexane, 68 mmol) was slowly added. The mixture was stirred for 30 minutes. Then 3.5g of 2-methyl quinoline (3.3mL, 24 mmol) was slowly added. The colour turned to orange rapidly then dark-brown. After 30 minutes, 10.6g of diethyl carbonate (11mL, 90 mmol) was added and the mixture was stirred for 2 hours. The reaction was quenched by 10 mL of water. The desired product **1n** (3.3g, 64%) was extracted by EtOAc and purified by silica gel column chromatography (PE/EtOAc = 20:1).

(3) 2-Ethyl quinoline was prepared following the reported methodology<sup>S1</sup>.

Reference:

S1 B. Qian, S. Guo, J. Shao, Q. Zhu, L. Yang, C. Xia and H. Huang, *J. Am. Chem. Soc.*, 2010, **132**, 3650 - 3651.

(B) Copies of NMR spectra for product 3

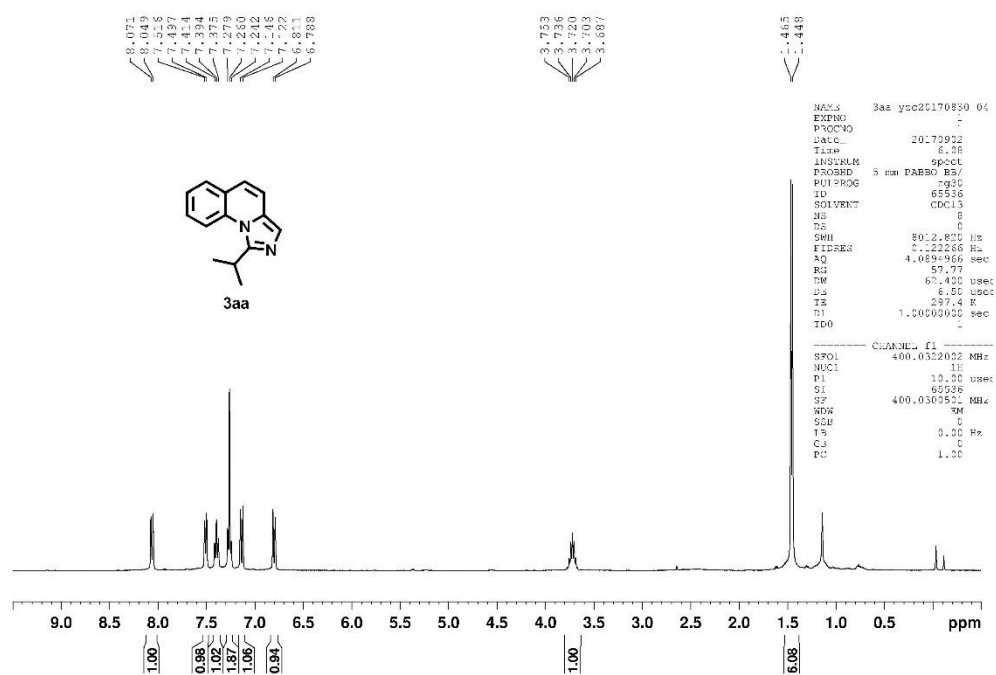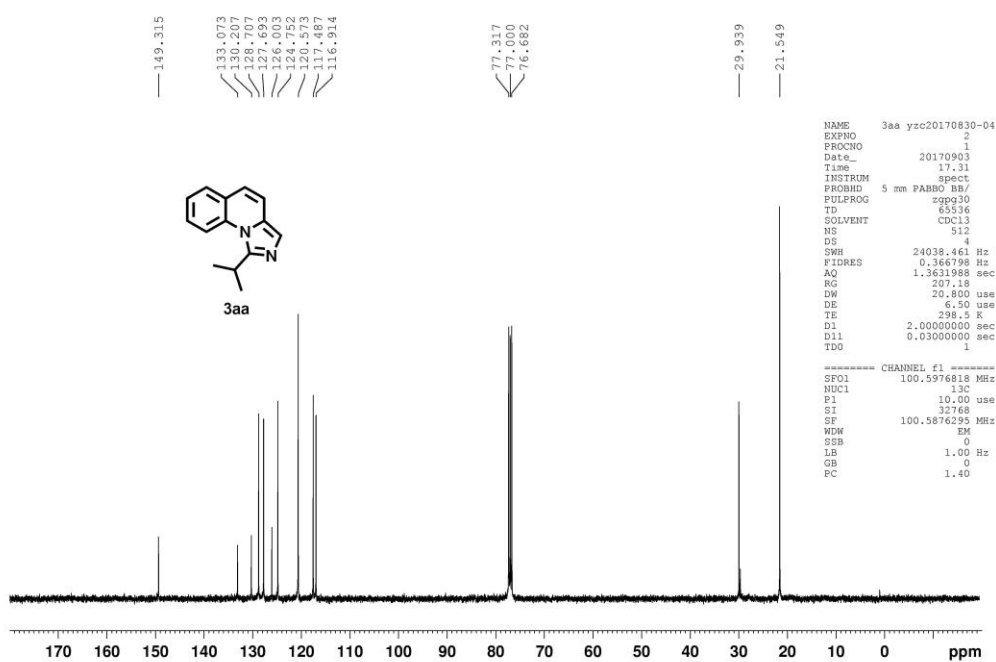

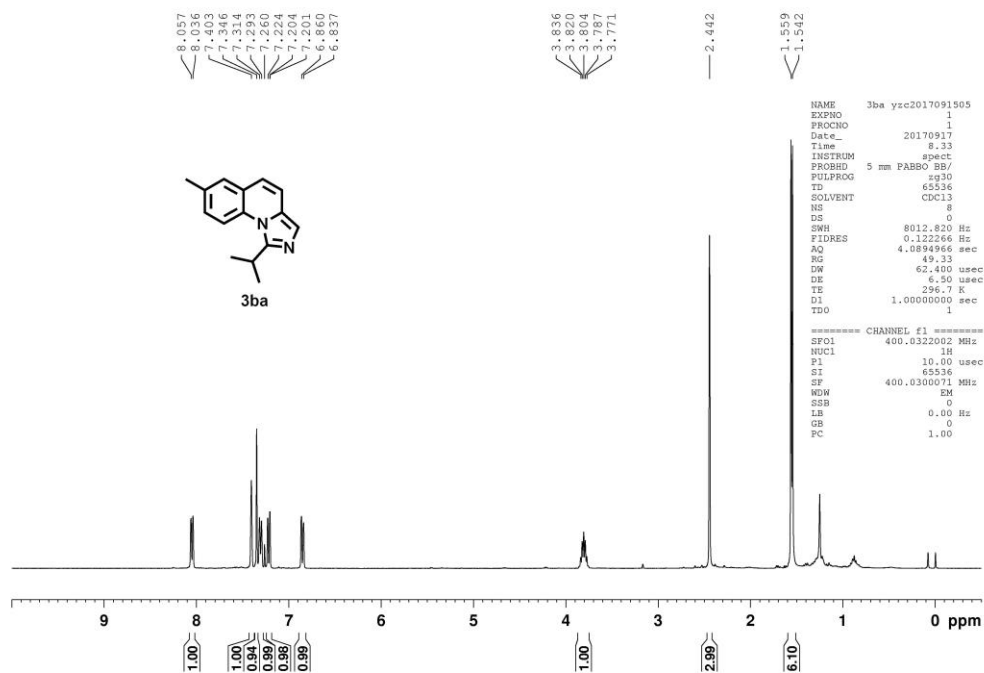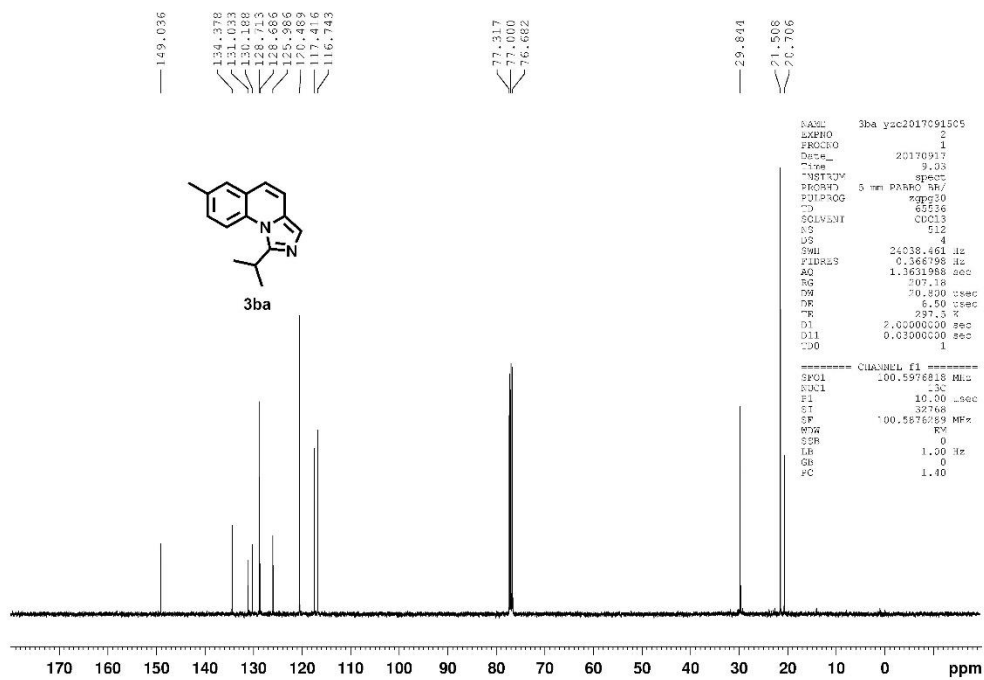

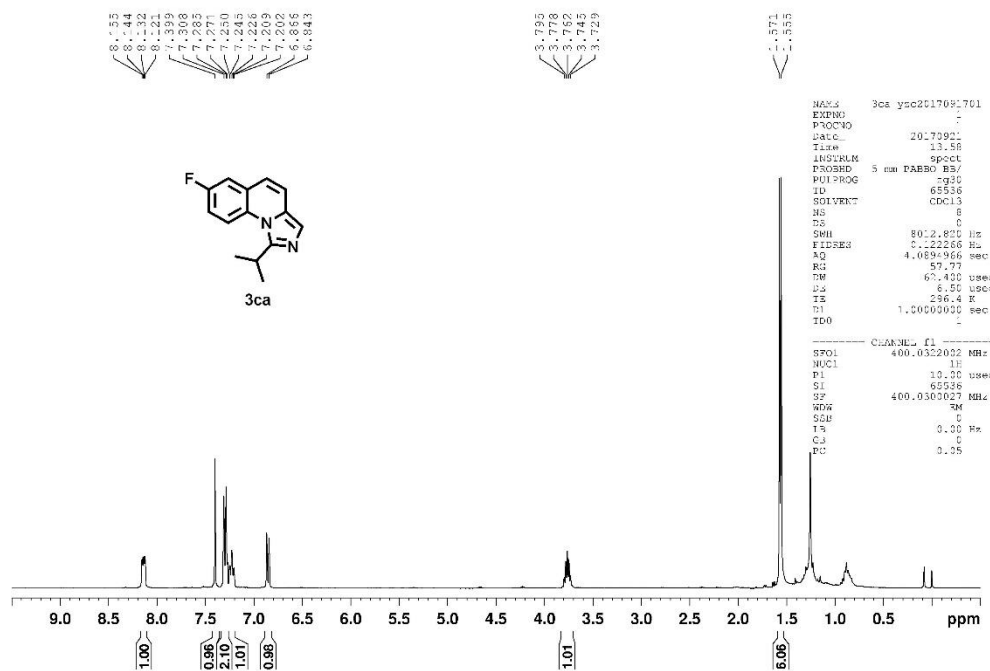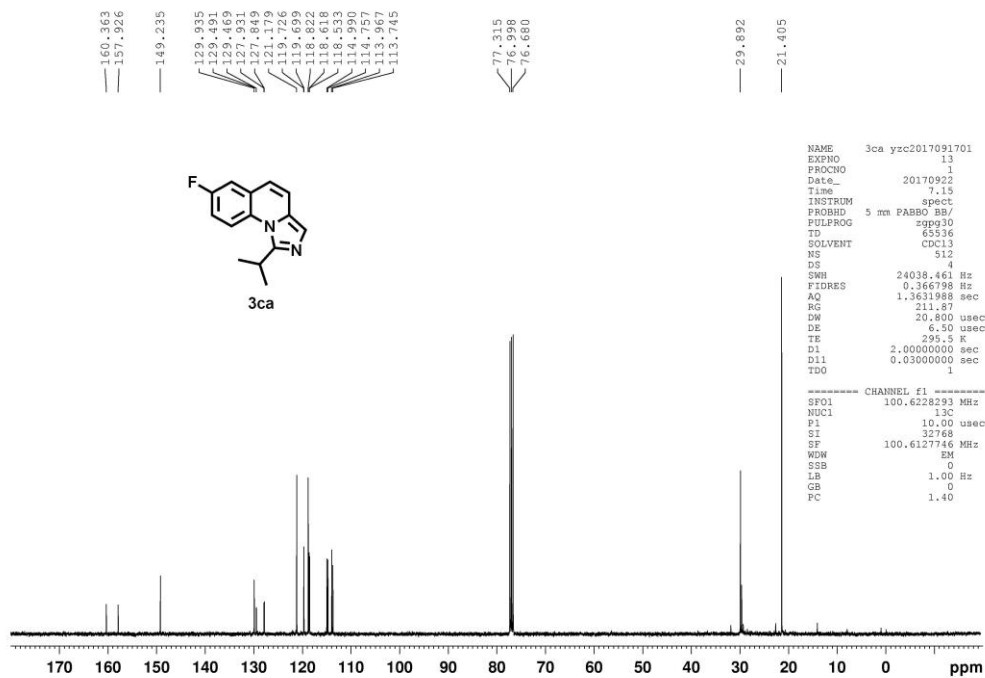

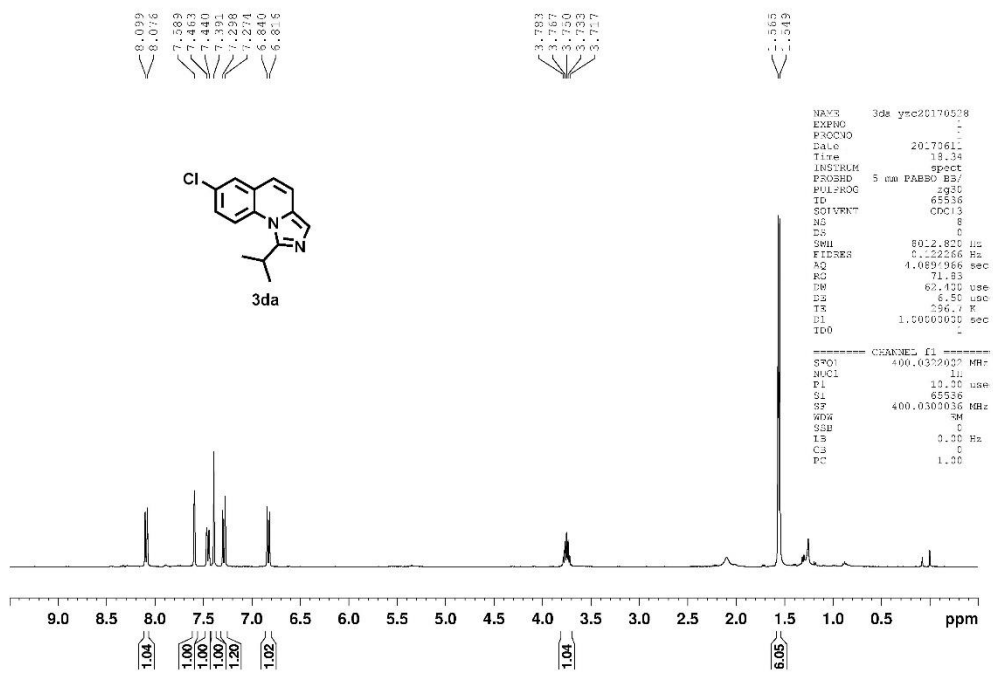

```

NAME      3da yzc20170528
EXPNO    1
PROCNO   1
Date_    20170611
Time     19.34
INSTRUM  spect
PROBHD   5 mm PABBO BBI
PULPROG  zgpg30
TD        65536
SOLVENT  CDCl3
NS        512
DS        4
SWH       24038.461 Hz
FIDRES   0.366798 Hz
AQ        1.3631988 sec
RG        207.18
DW        20.800 usec
DE        6.50 usec
TE        297.6 K
D1        2.0000000 sec
D11       0.0300000 sec
TD0       1
----- CHANNEL f1 -----
SF01     400.032002 MHz
NUC1      13C
P1        12.00 usec
SI        65536
SF        400.0300036 MHz
WDW       EM
SSB       0
LB        0.00 Hz
GB        0
PC        1.00
  
```

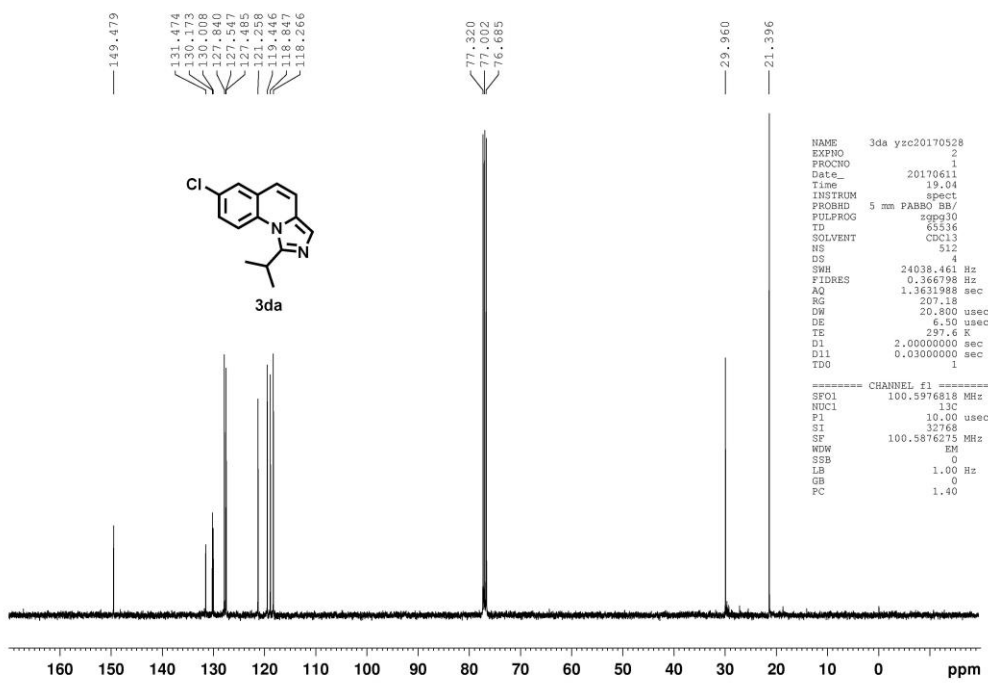

```

NAME      3da yzc20170528
EXPNO    2
PROCNO   1
Date_    20170611
Time     19.04
INSTRUM  spect
PROBHD   5 mm PABBO BBI
PULPROG  zgpg30
TD        65536
SOLVENT  CDCl3
NS        512
DS        4
SWH       24038.461 Hz
FIDRES   0.366798 Hz
AQ        1.3631988 sec
RG        207.18
DW        20.800 usec
DE        6.50 usec
TE        297.6 K
D1        2.0000000 sec
D11       0.0300000 sec
TD0       1
----- CHANNEL f1 -----
SF01     100.5976818 MHz
NUC1      13C
P1        12.00 usec
SI        32768
SF        100.5876275 MHz
WDW       EM
SSB       0
LB        1.00 Hz
GB        0
PC        1.40
  
```

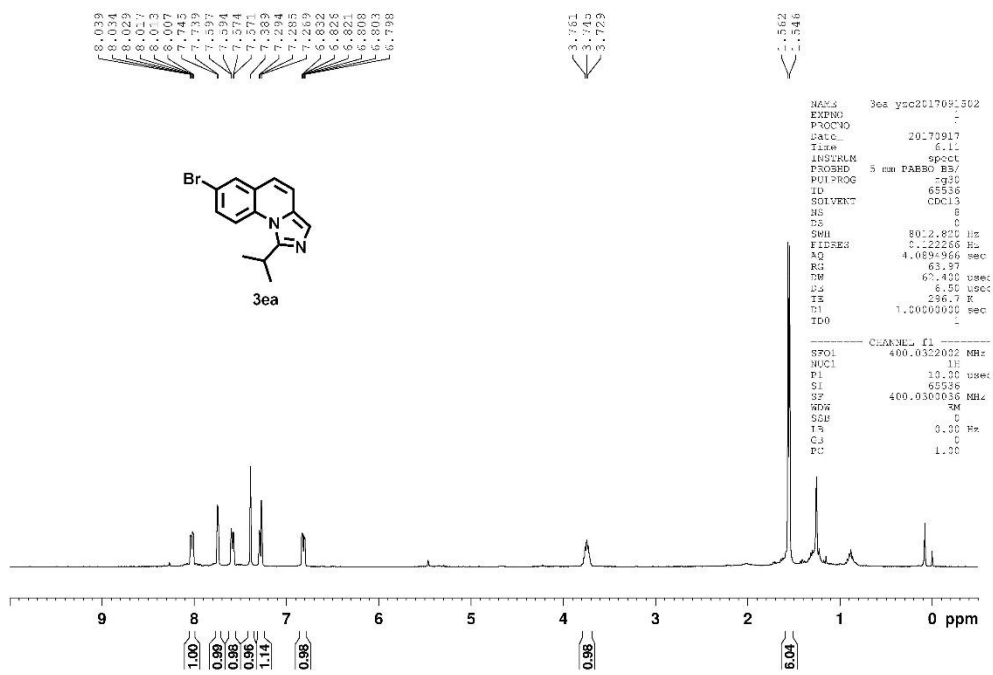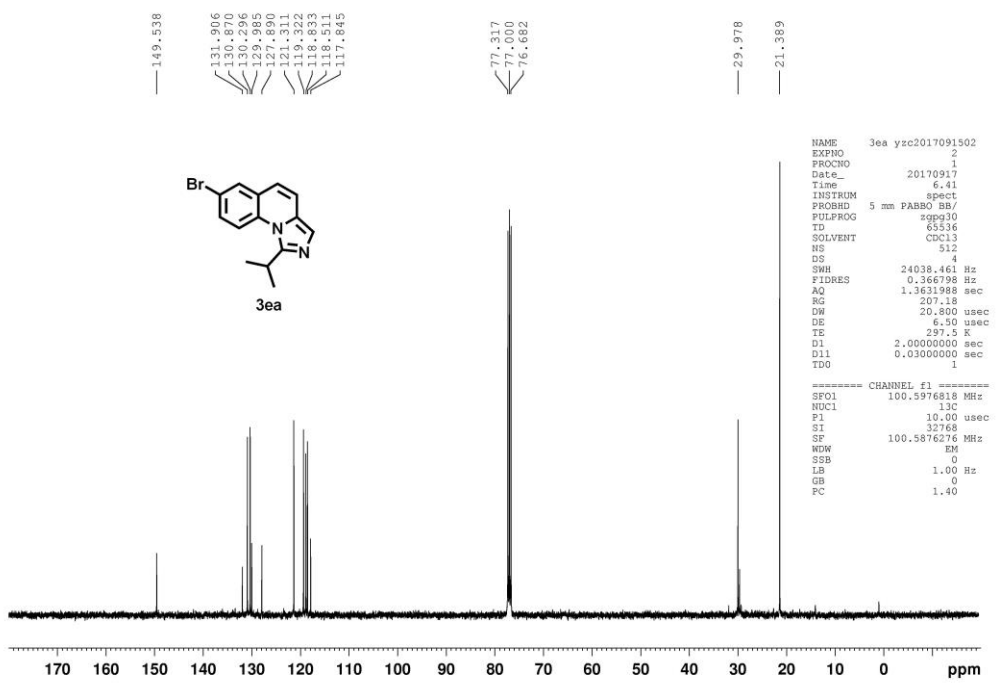

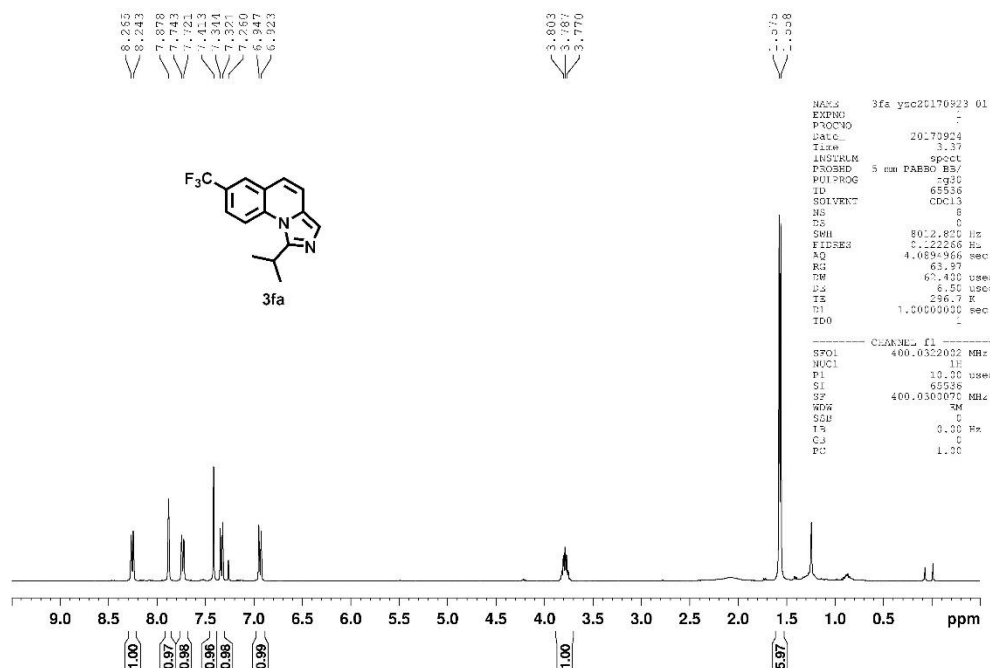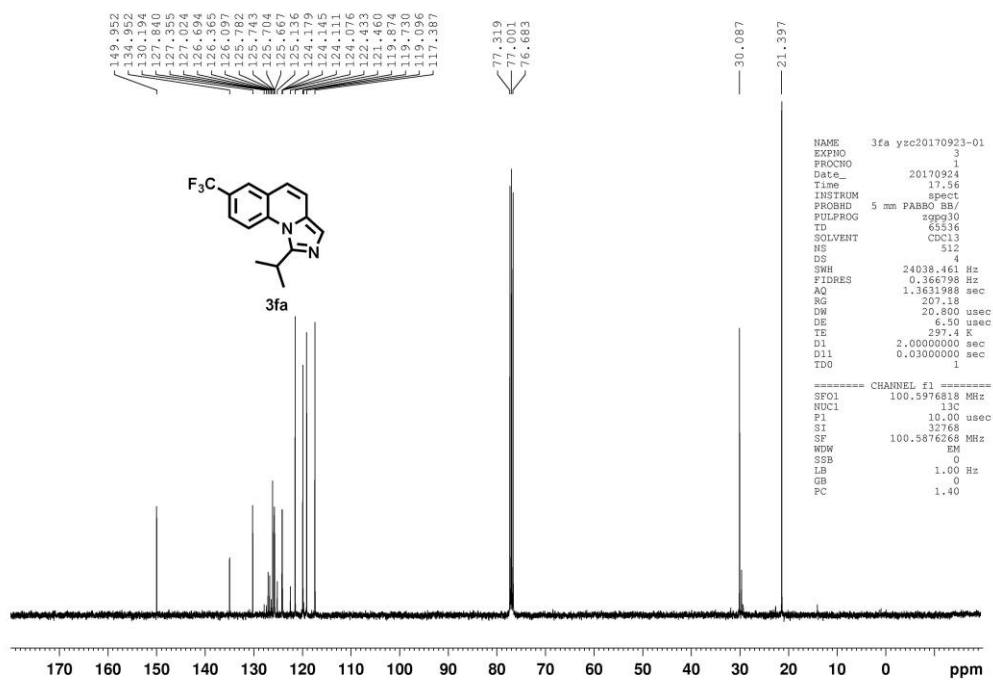



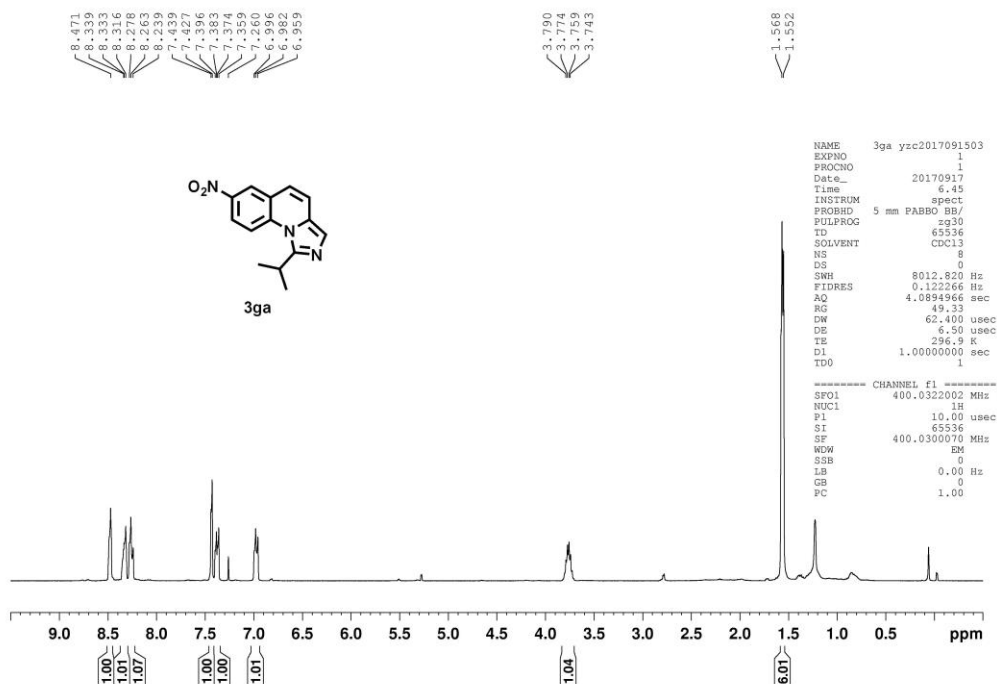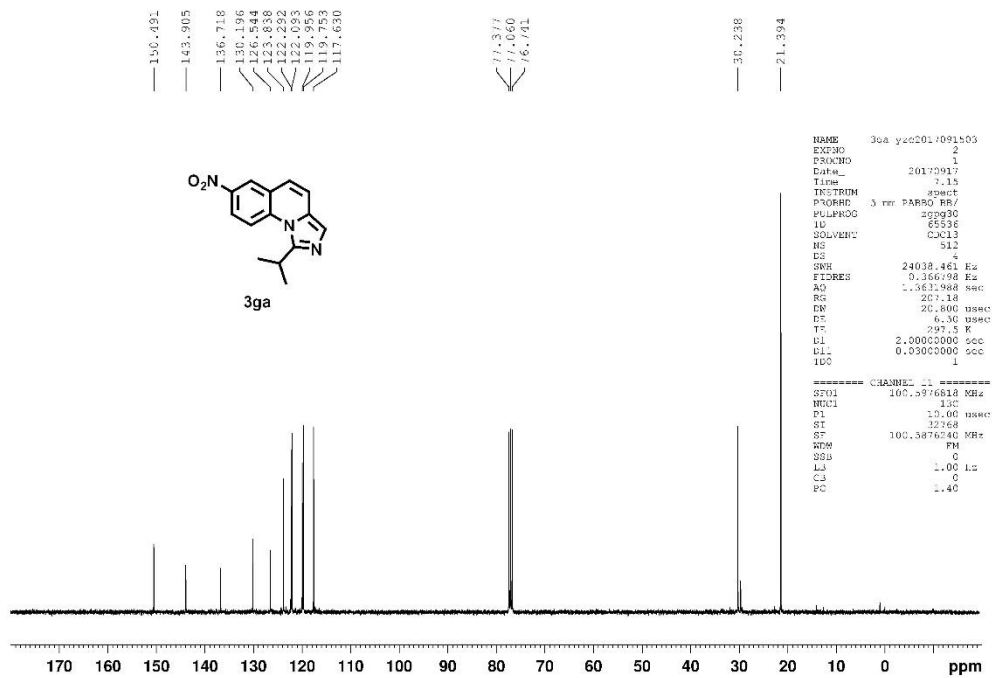

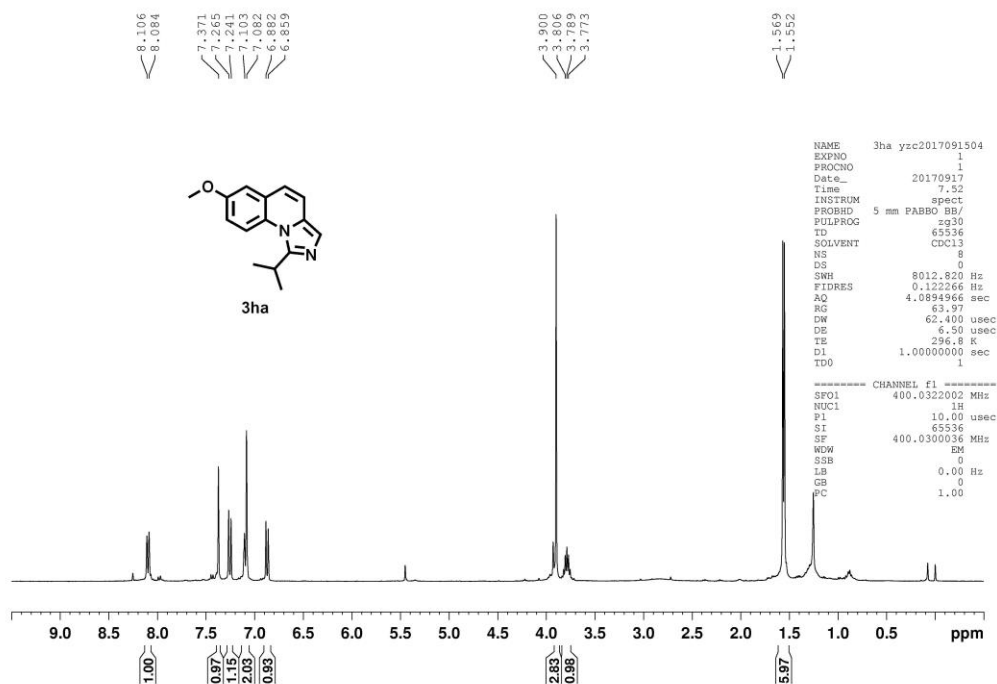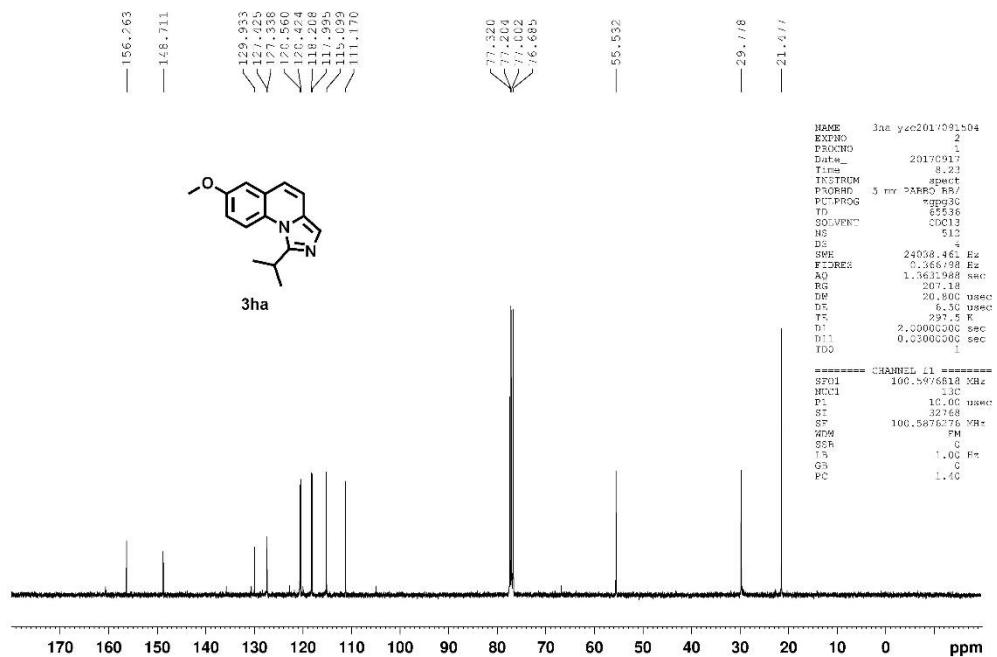

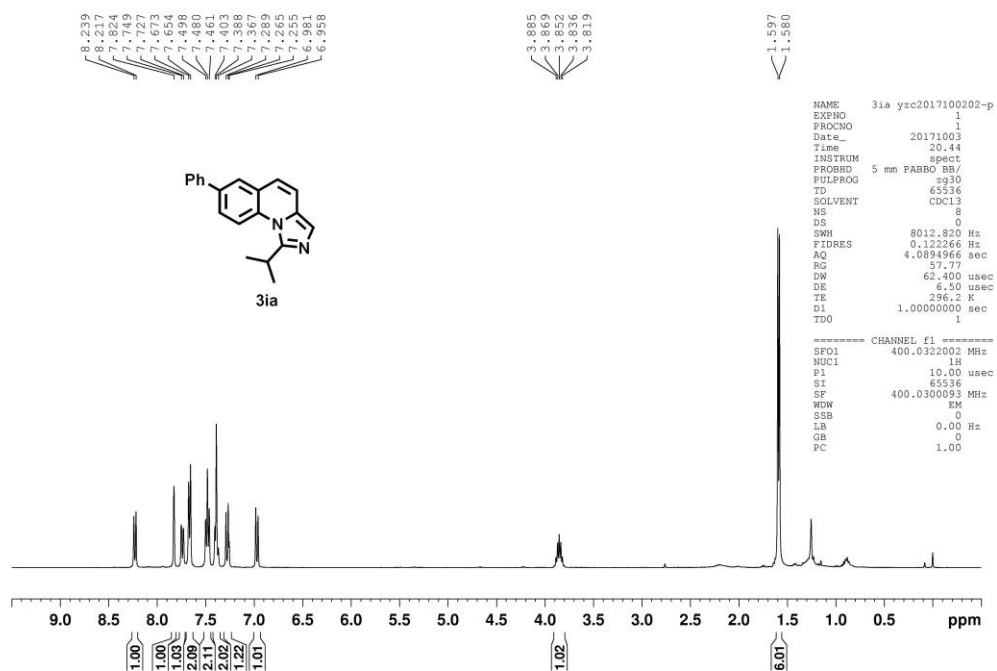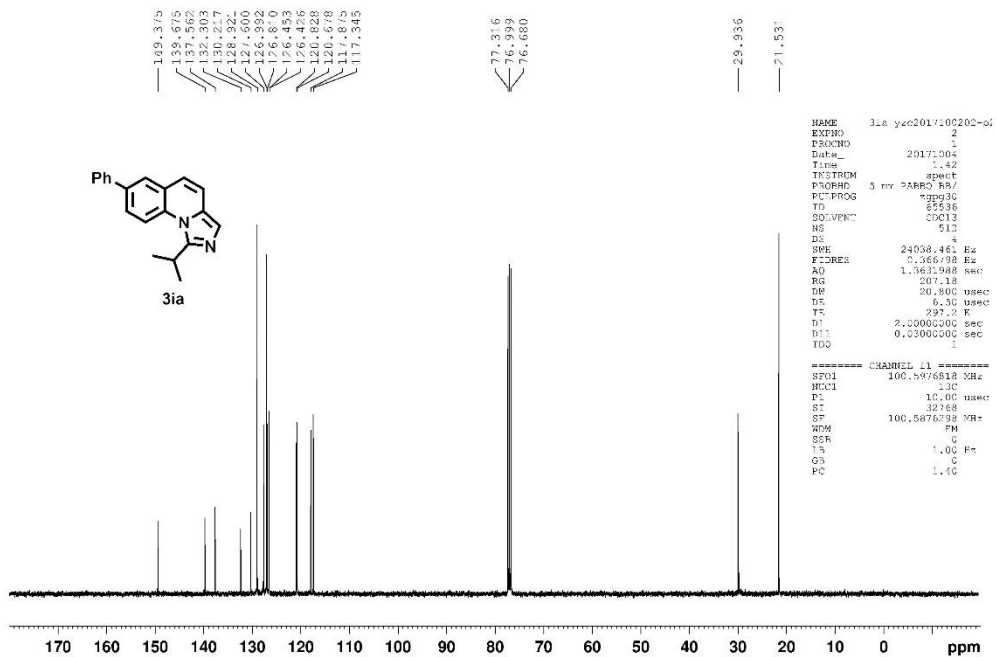

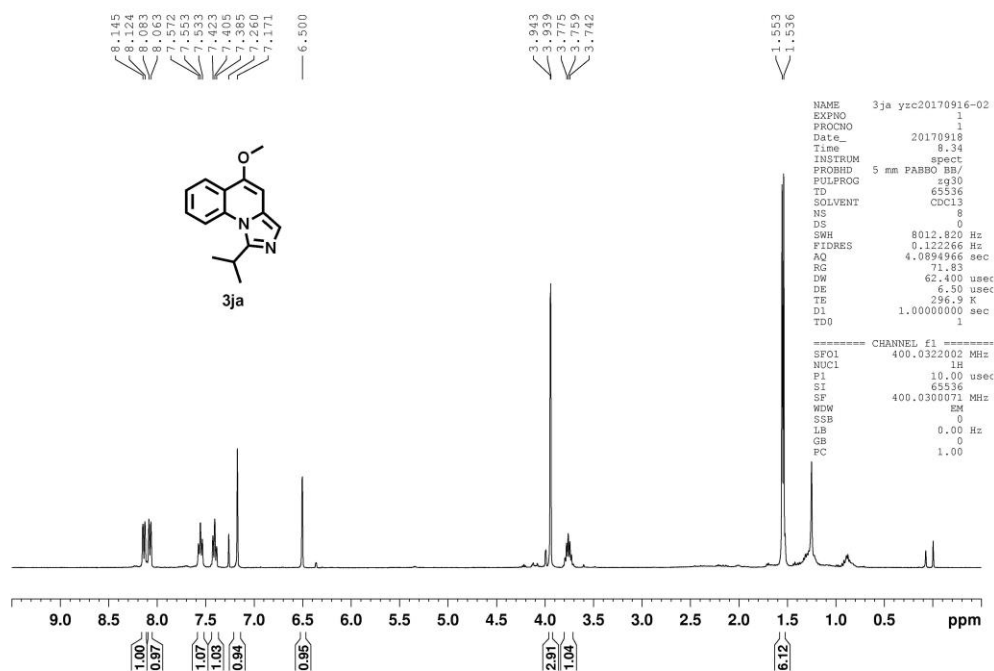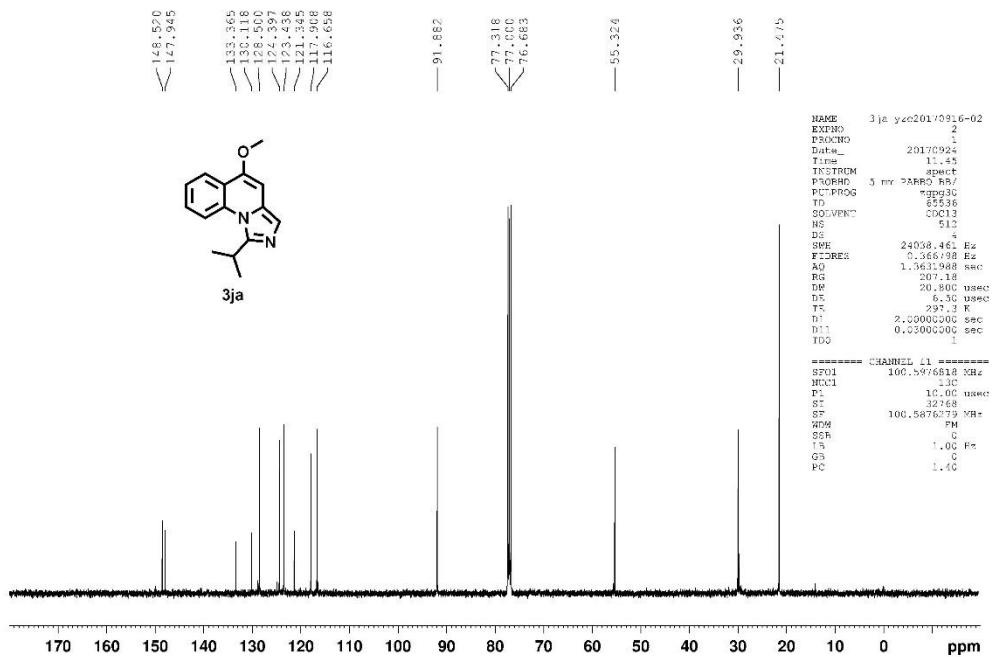

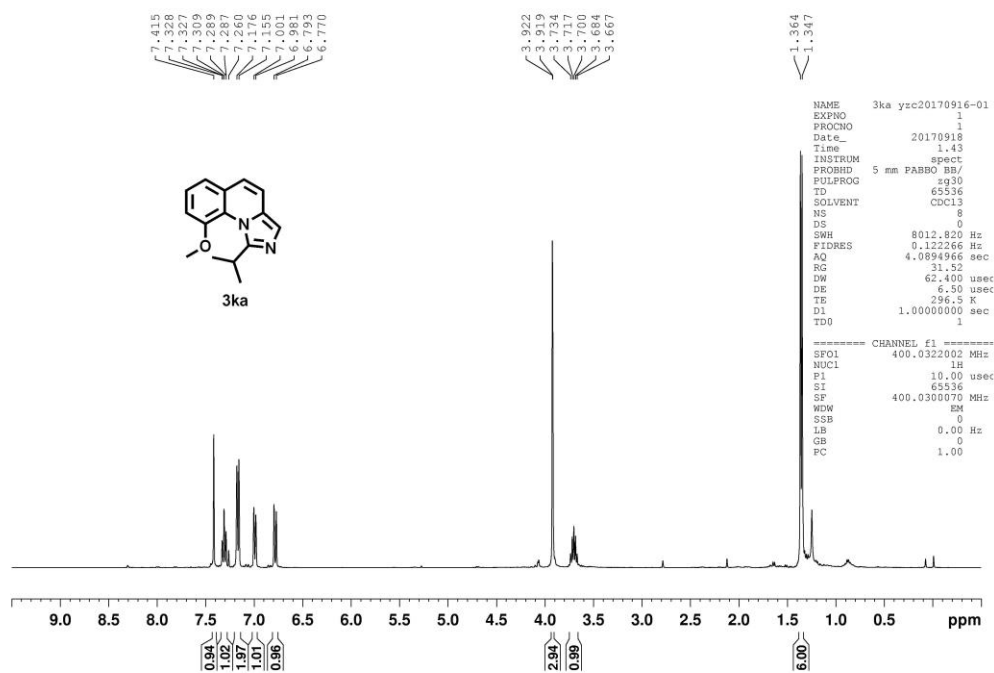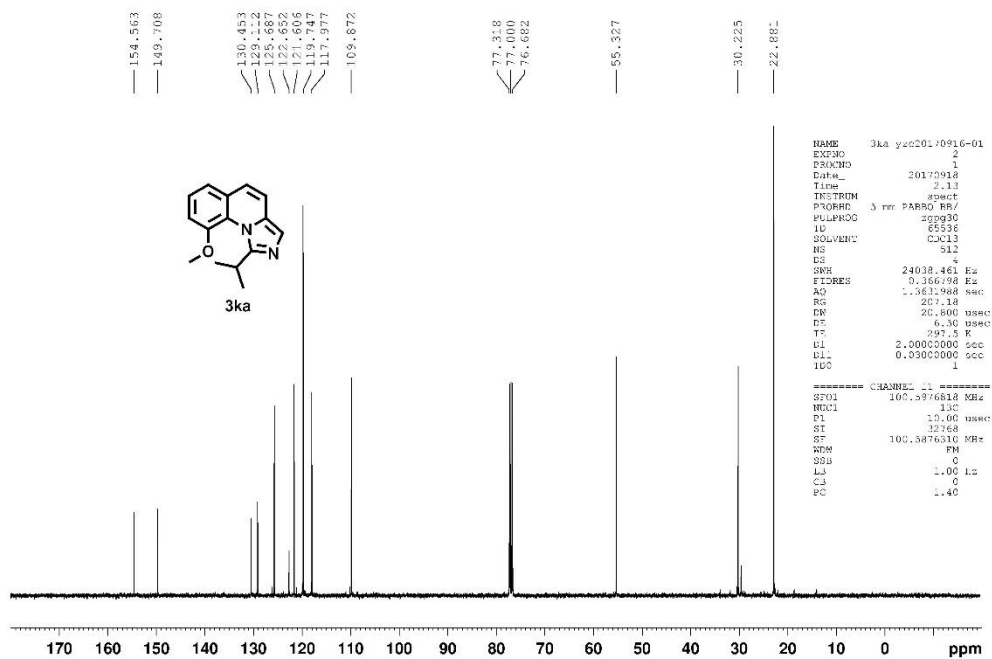

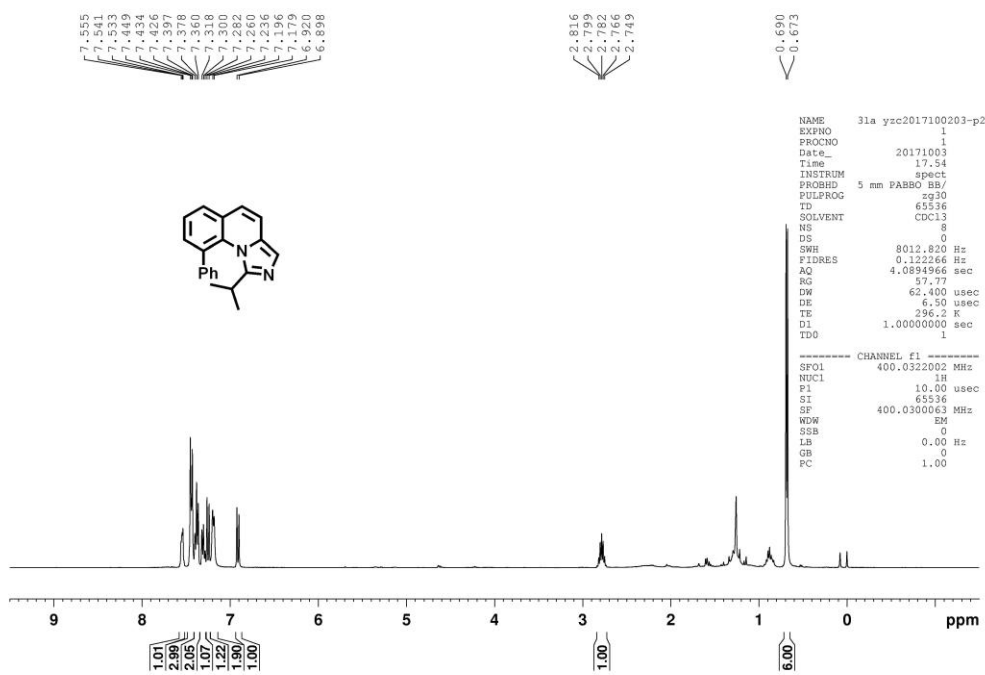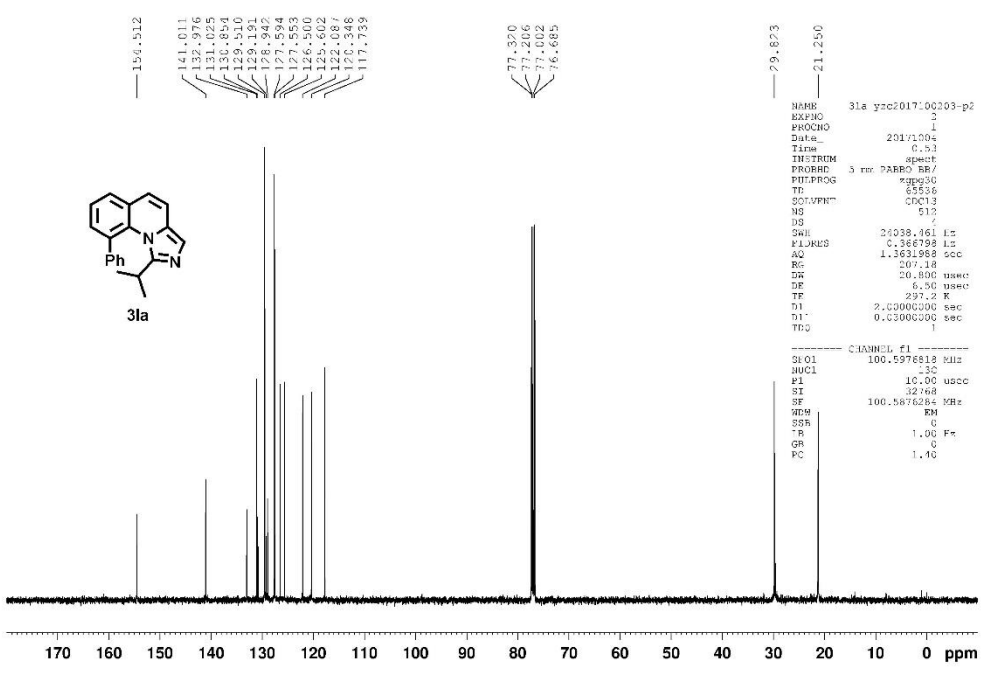

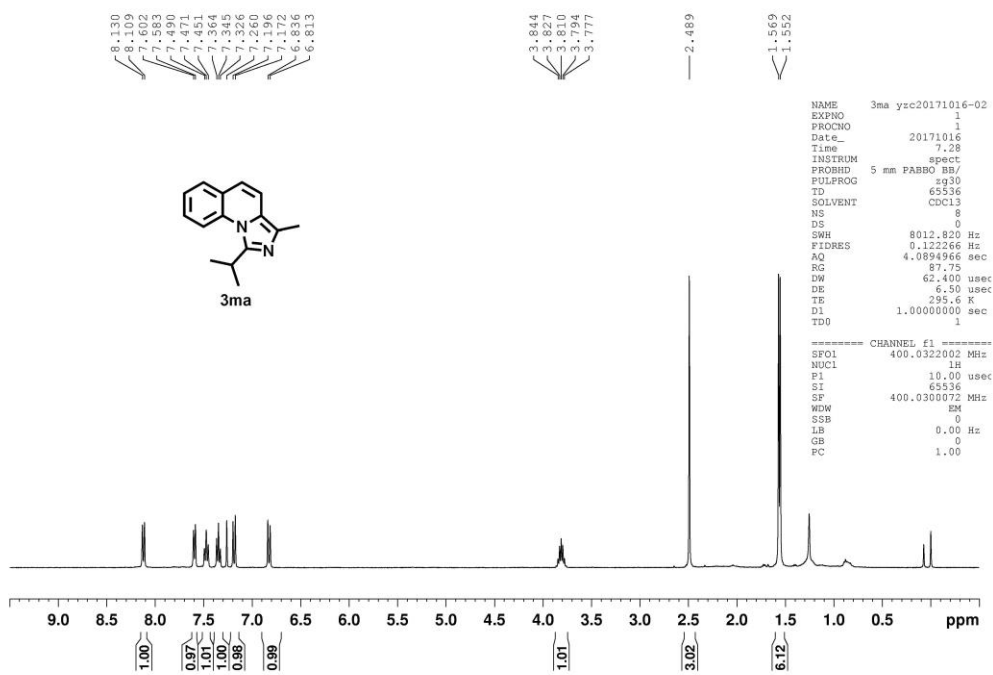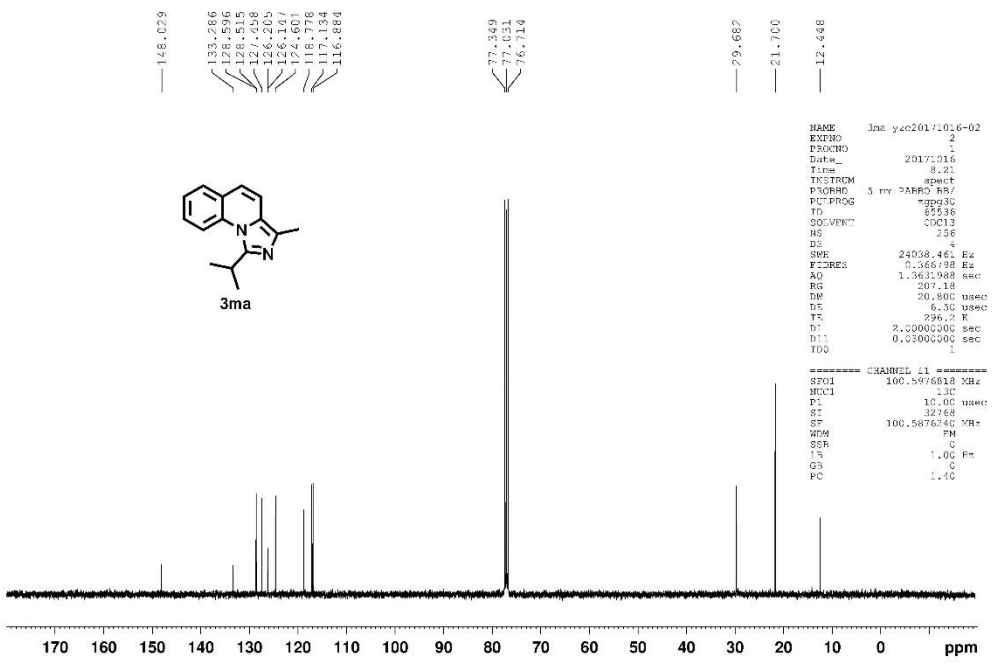

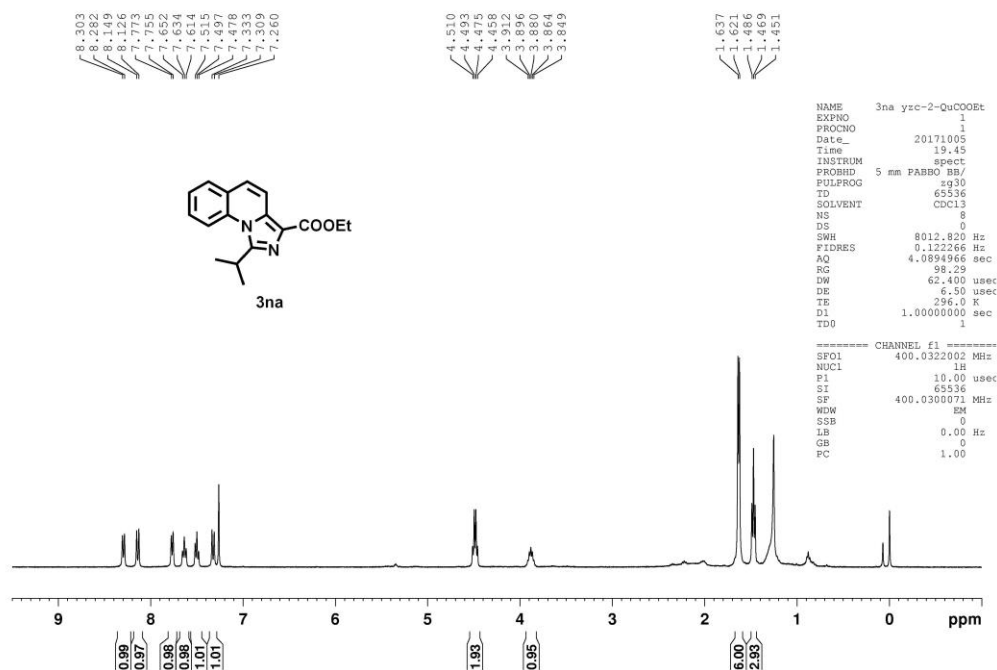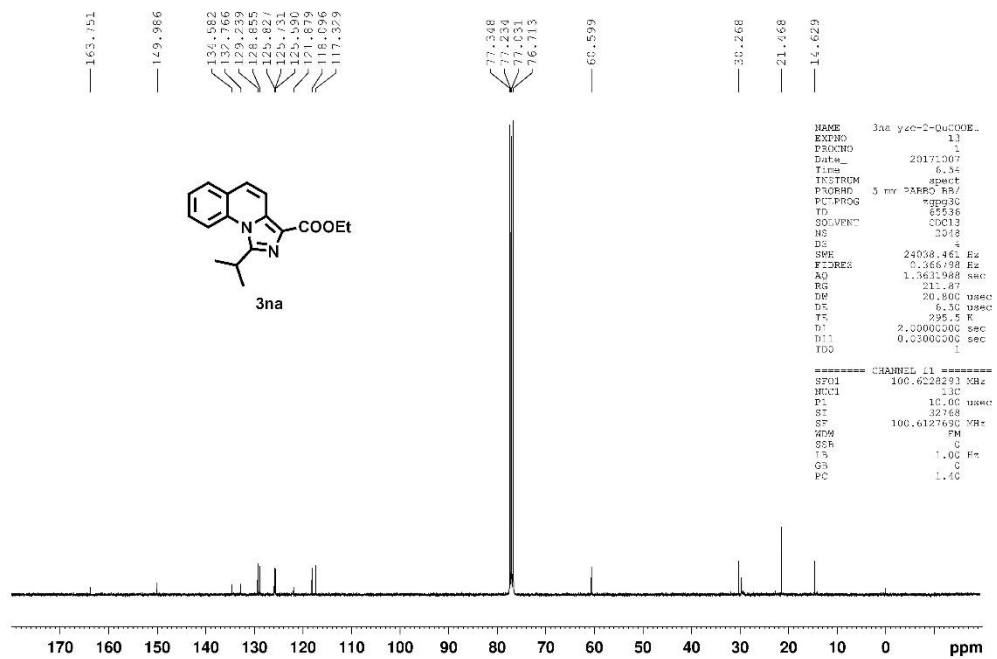



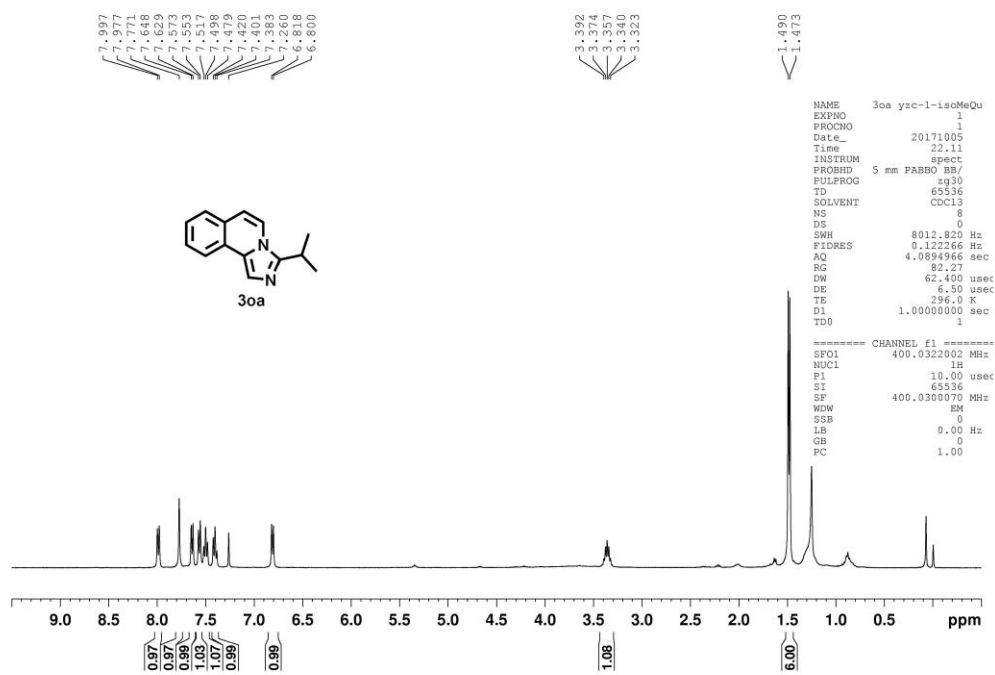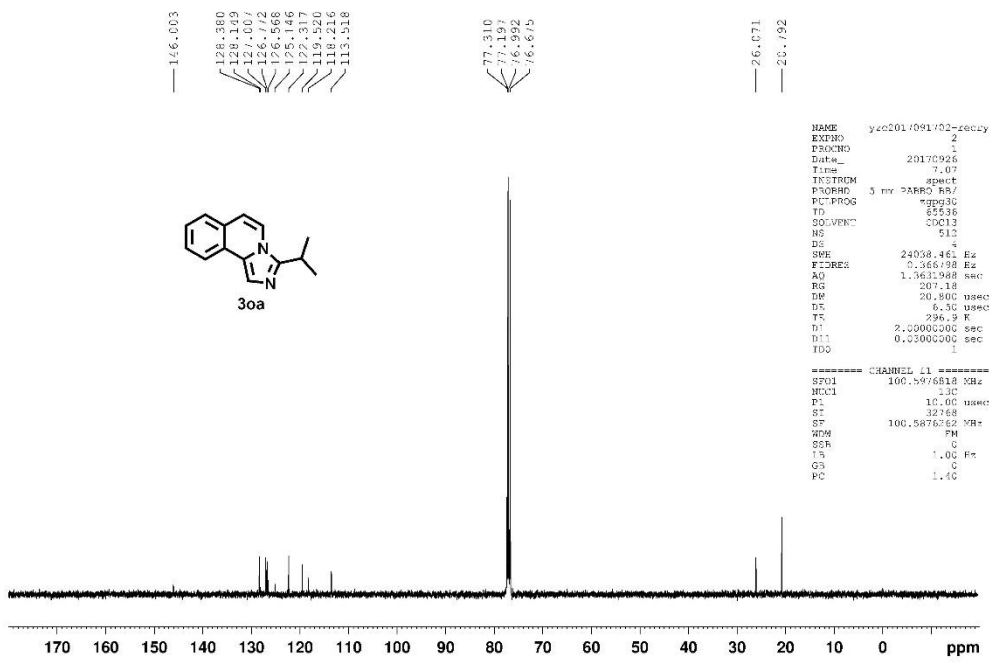

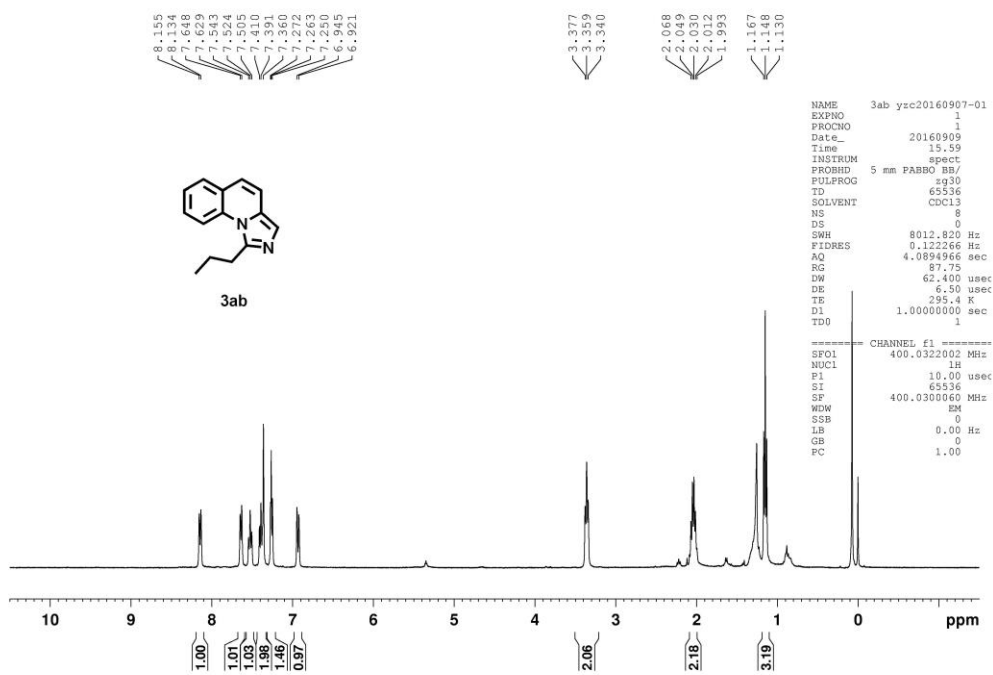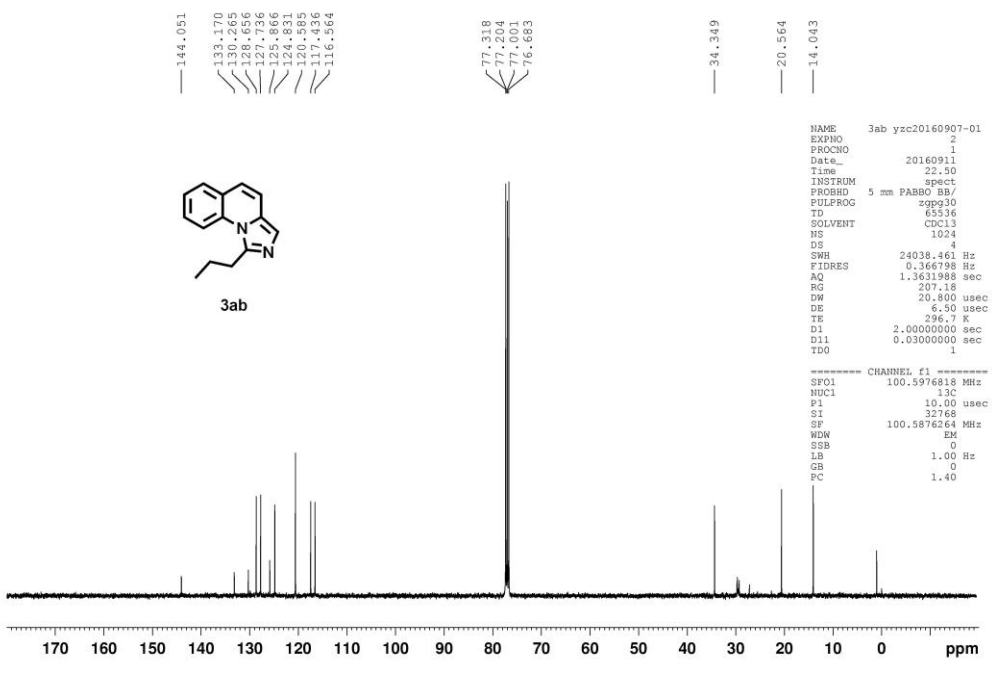

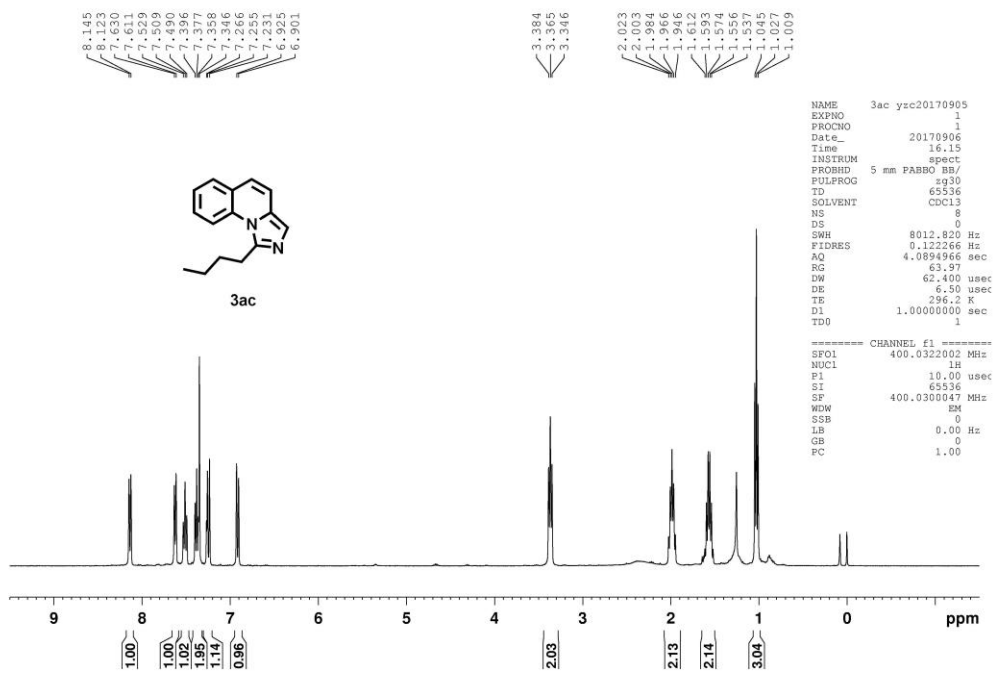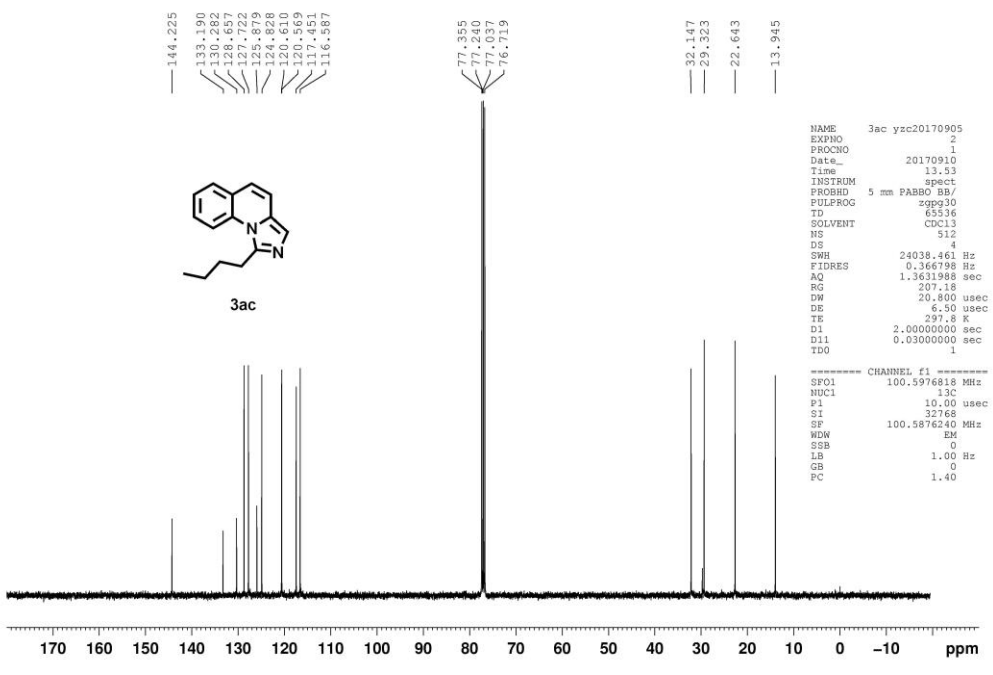

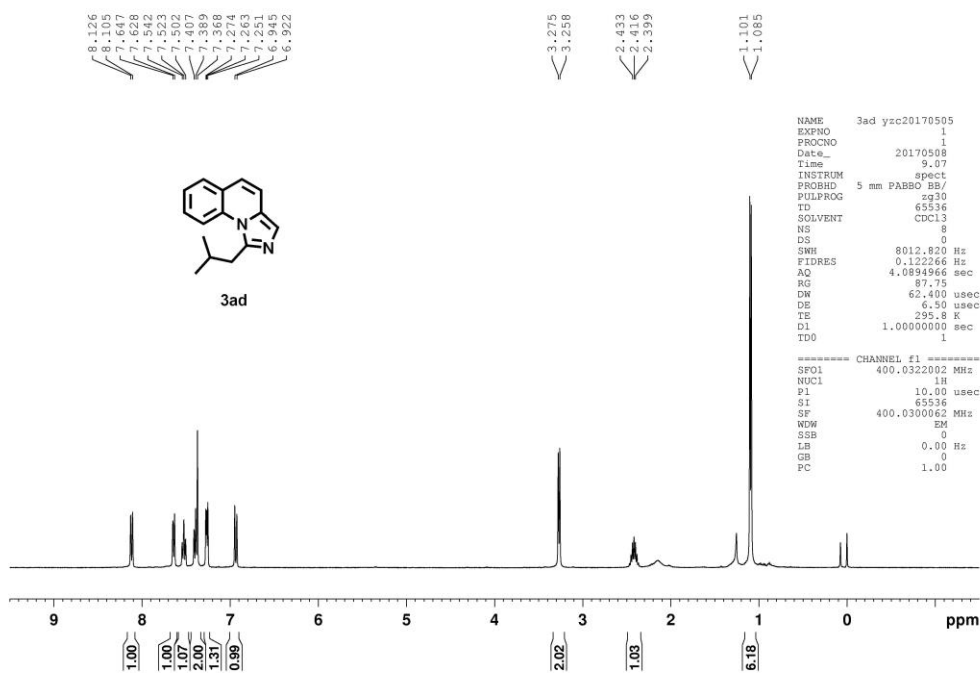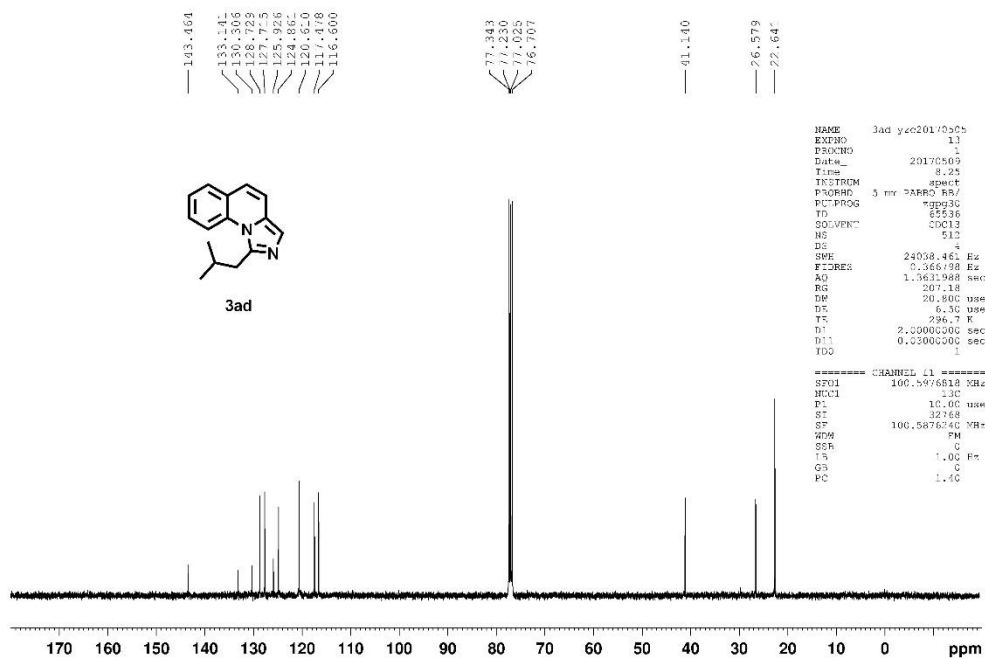

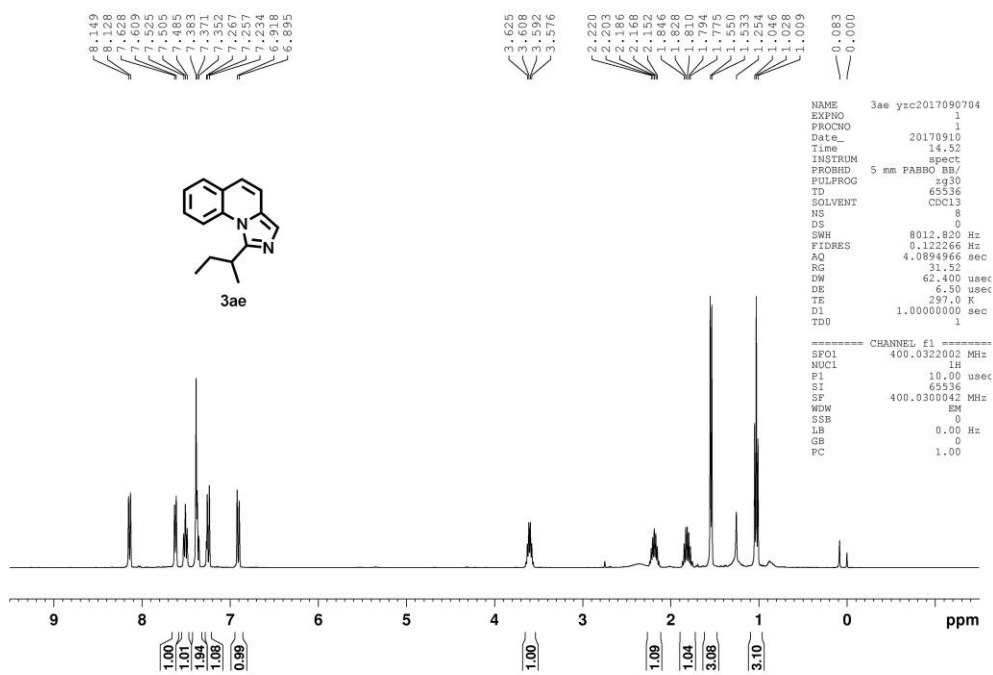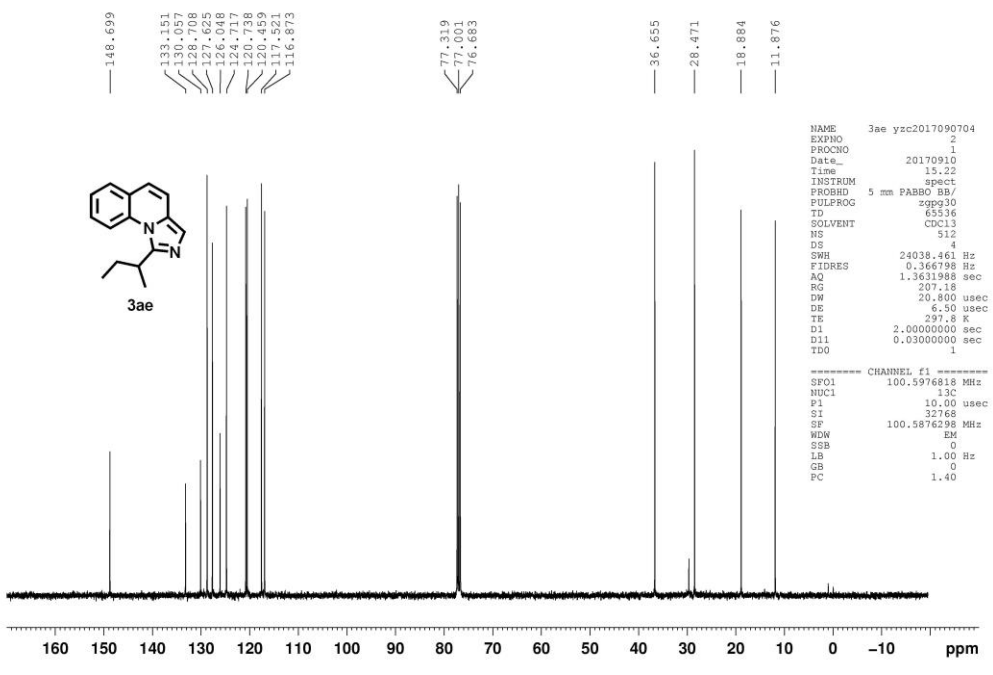

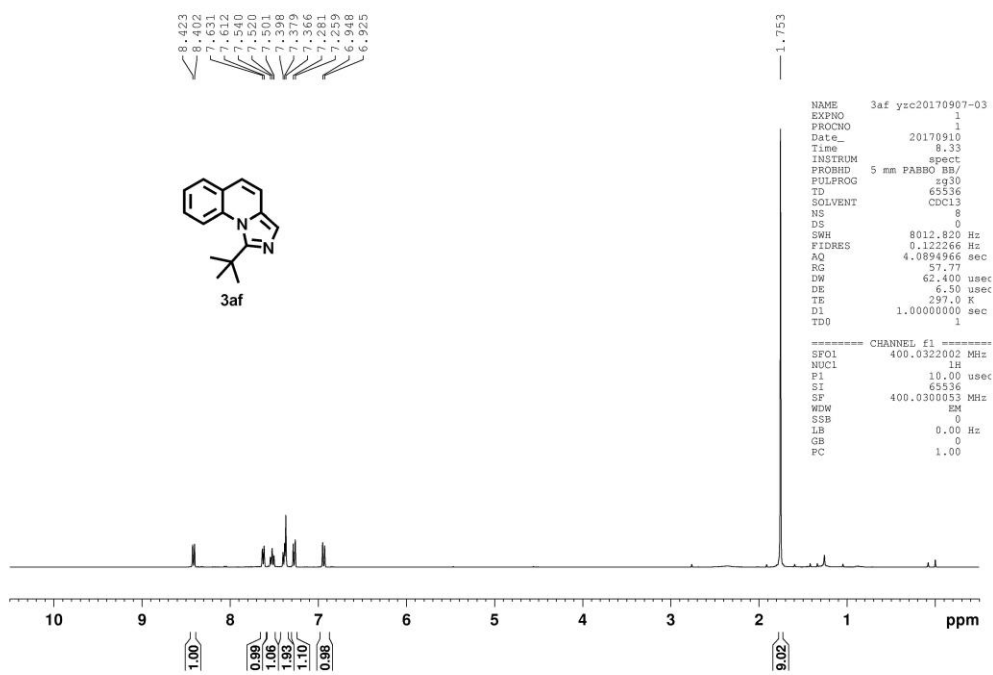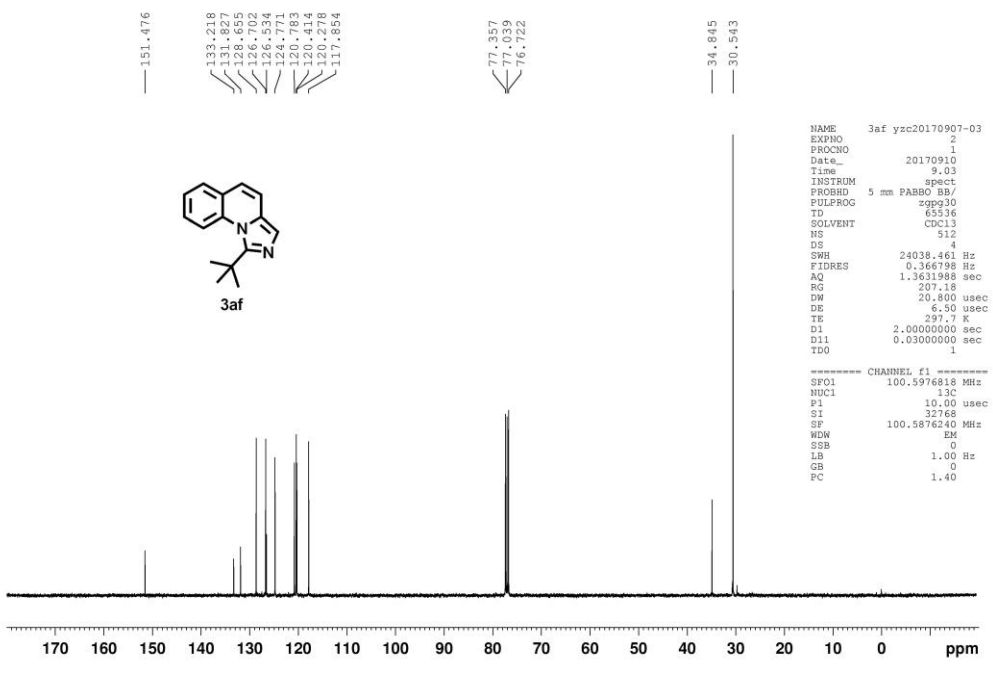

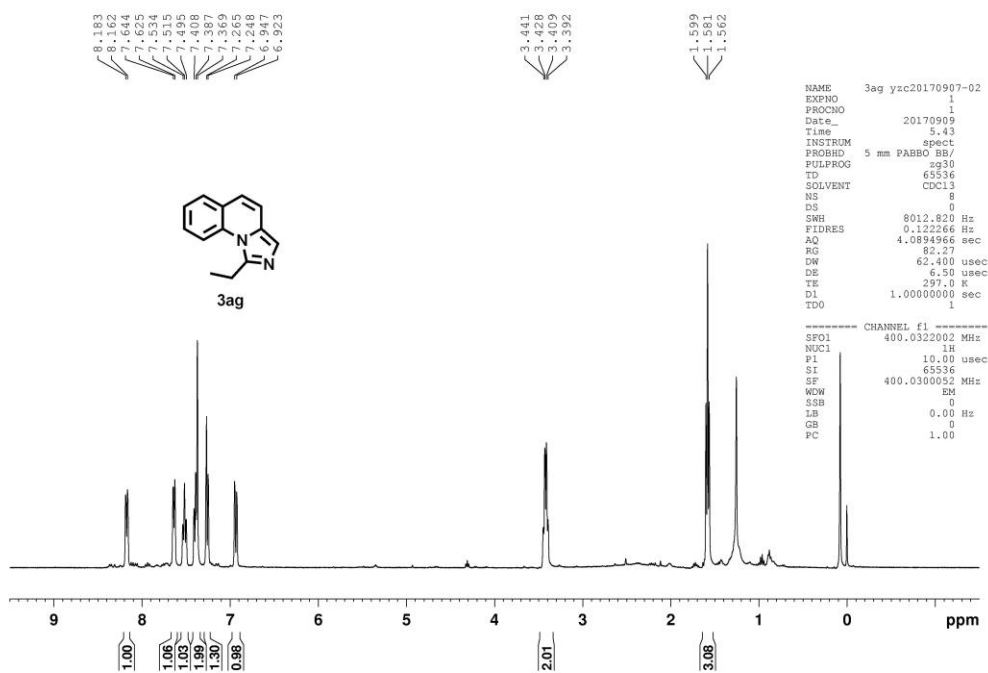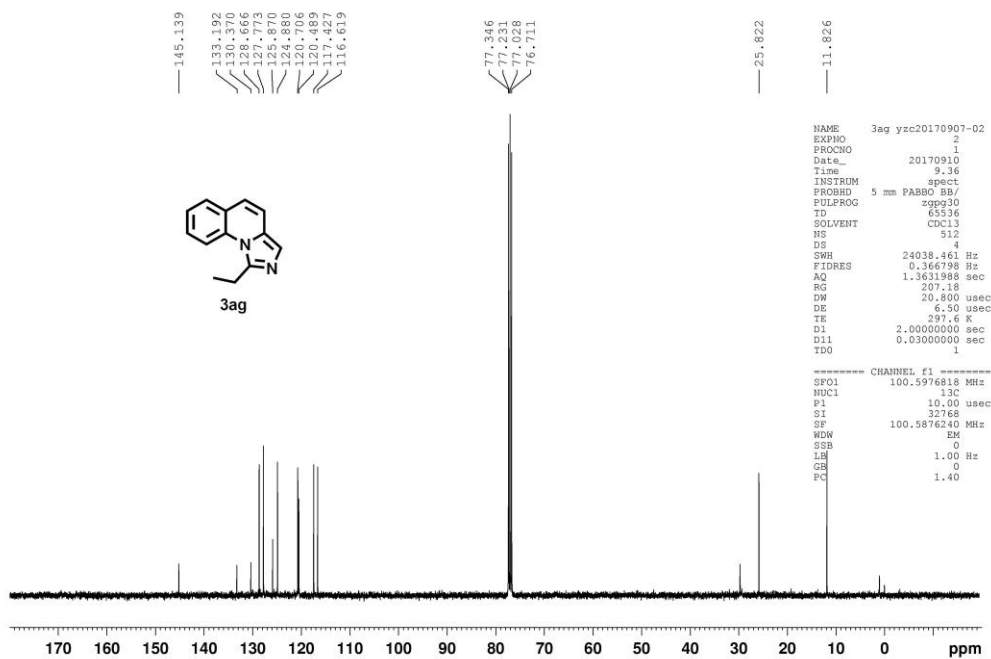

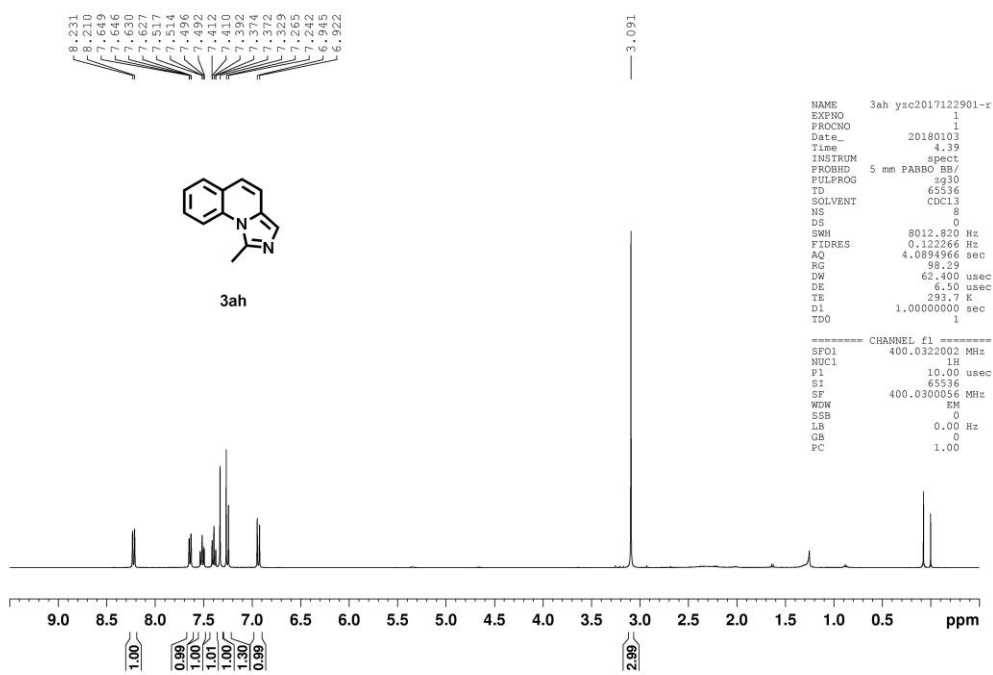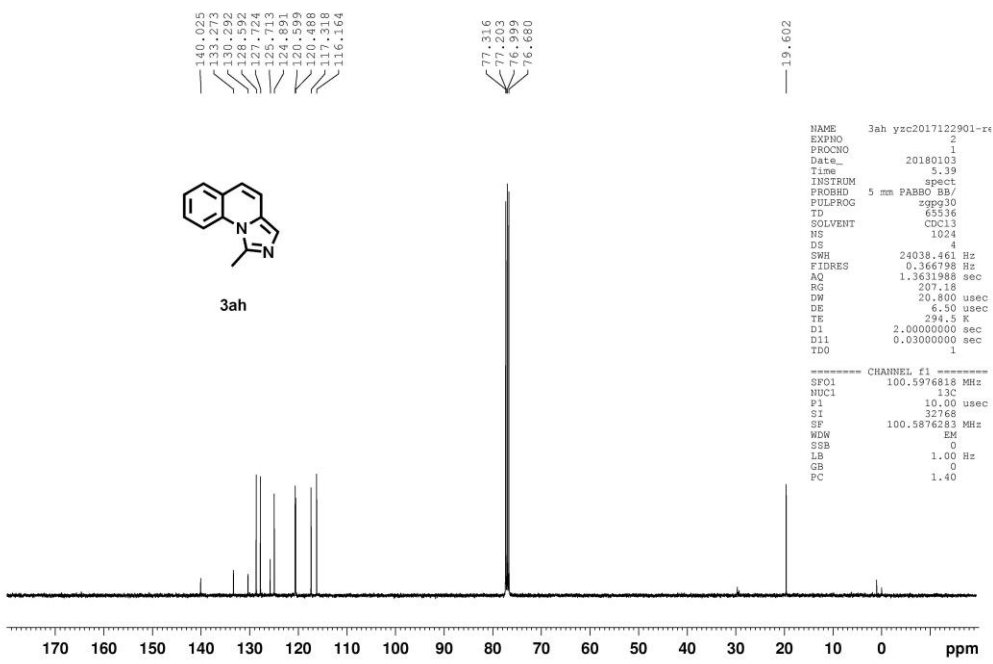



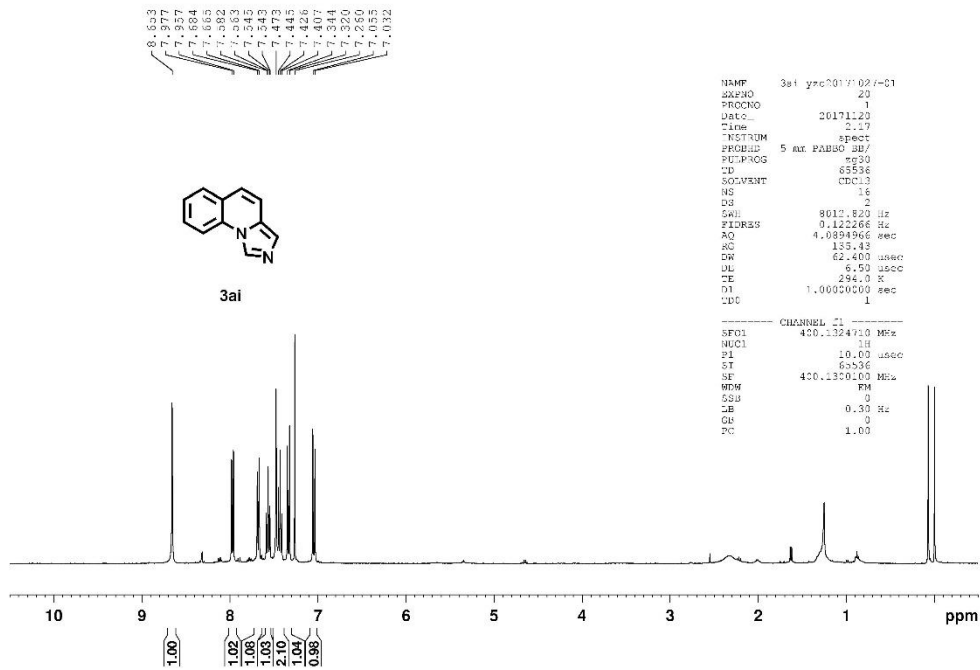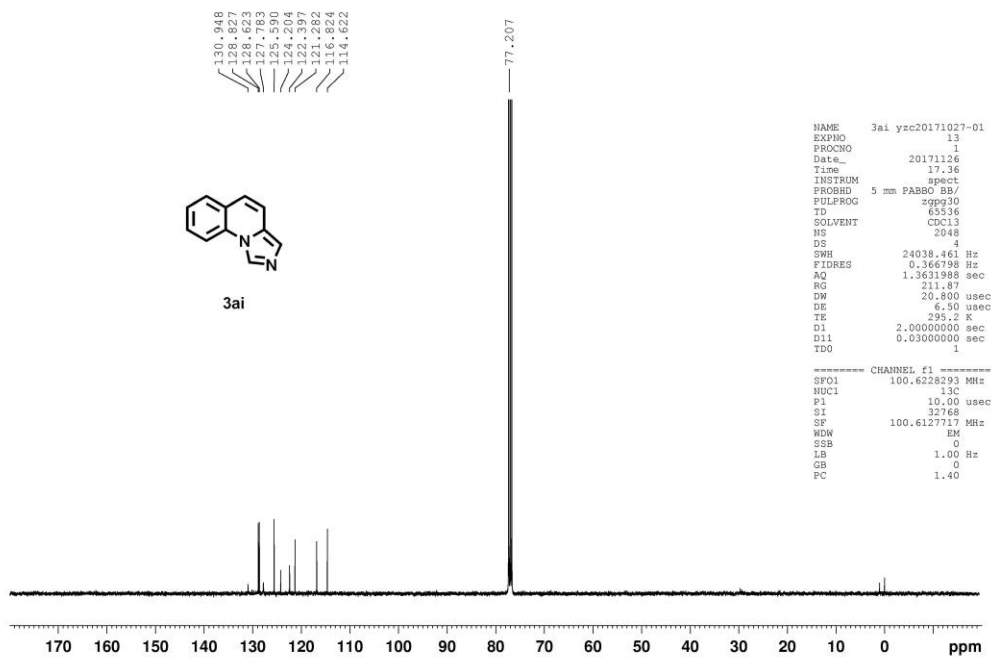

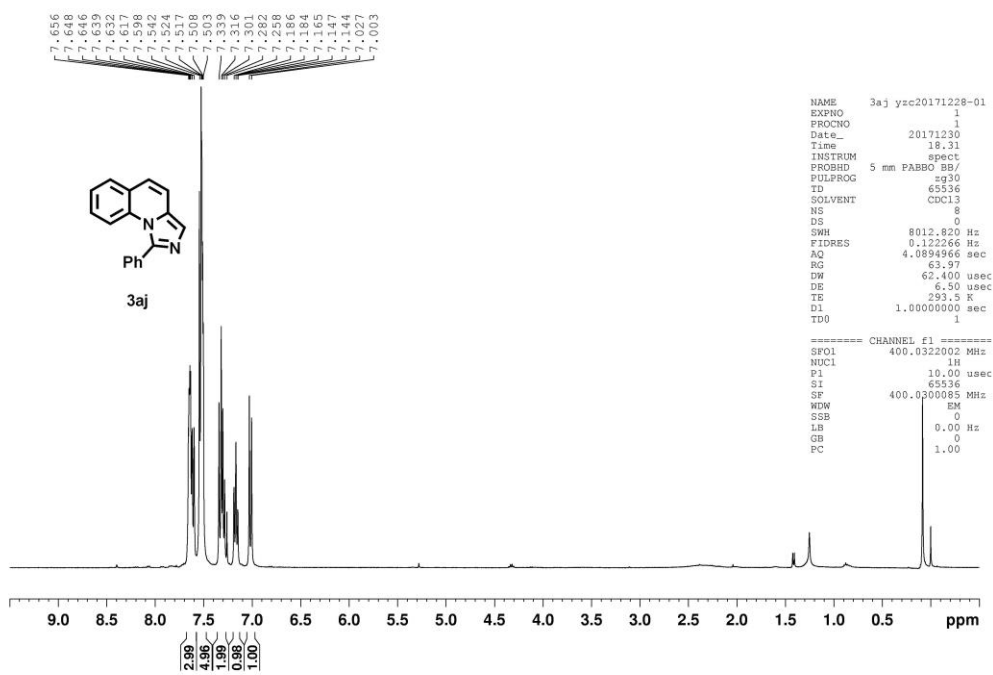

```

NAME      3aj ysc20171228-01
EXPNO    1
PROCNO   1
Date_    20171230
Time     18.31
INSTRUM  spect
PROBHD   5 mm PABBO BB/
PULPROG  zg30
TD       65536
SOLVENT  CDCl3
NS       8
DS       0
SWH      8012.820 Hz
FIDRES   0.122266 Hz
AQ       4.089466 sec
RG       63.97
DW       62.400 usec
DE       6.50 usec
TE       293.5 K
D1       1.00000000 sec
TD0      1

===== CHANNEL f1 =====
SF01    400.032002 MHz
NUC1     1H
P1      10.00 usec
SI      65536
SF      400.0300085 MHz
WDW     EM
SSB     0
LB      0.00 Hz
GB      0
PC      1.00

```

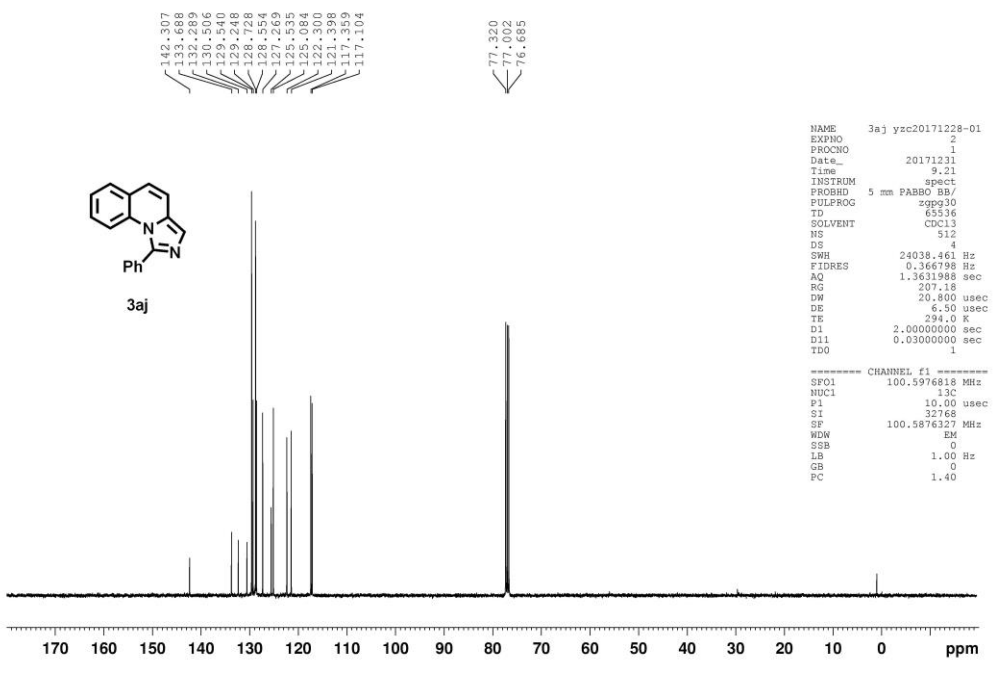

```

NAME      3aj ysc20171228-01
EXPNO    2
PROCNO   1
Date_    20171231
Time     9.21
INSTRUM  spect
PROBHD   5 mm PABBO BB/
PULPROG  zgpg30
TD       65536
SOLVENT  CDCl3
NS       512
DS       2
SWH      24038.461 Hz
FIDRES   0.366798 Hz
AQ       1.3631988 sec
RG       207.18
DW       20.800 usec
DE       6.50 usec
TE       294.0 K
D1       2.00000000 sec
D11      0.03000000 sec
TD0      1

===== CHANNEL f1 =====
SF01    100.5976818 MHz
NUC1    13C
P1      10.00 usec
SI      32768
SF      100.5876327 MHz
WDW     EM
SSB     0
LB      1.00 Hz
GB      0
PC      1.40

```

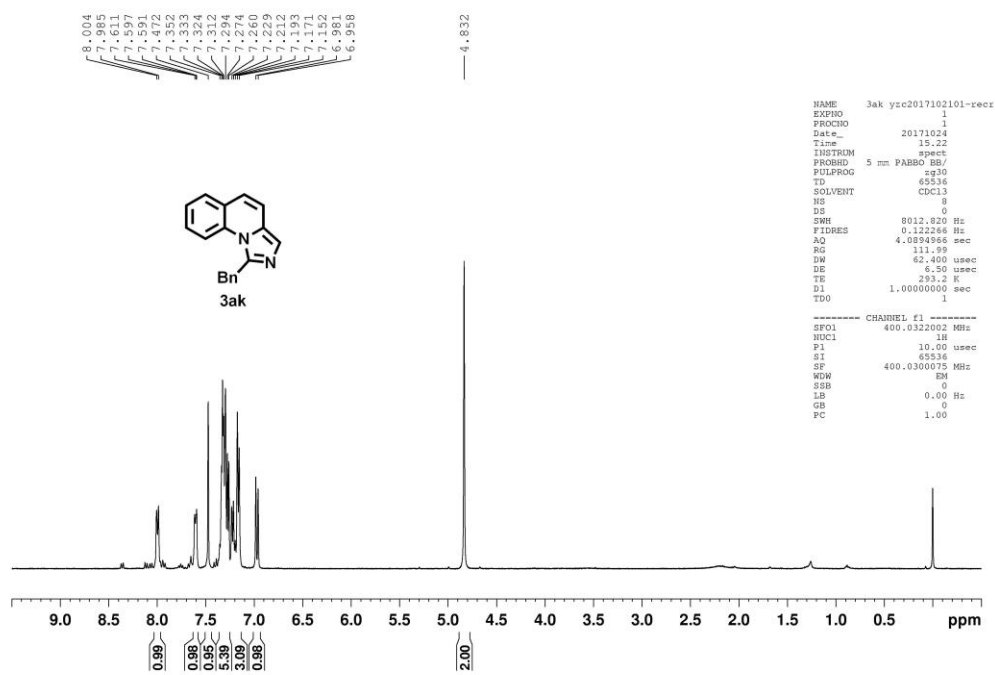

```

NAME      3ak yzc2017102101-rec
EXPNO     1
PROCNO    1
Date_     20171024
Time      15.22
INSTRUM   spect
PROBHD    5 mm PABBO BB/
PULPROG   zgpg30
TD         65536
SOLVENT   CDCl3
NS         8
DS         4
SWH        8012.820 Hz
FIDRES     0.122286 Hz
AQ         4.0394966 sec
RG         111.99
DW         62.400 usec
DE         6.50 usec
TE         293.2 K
D1         1.00000000 sec
TD0        1
----- CHANNEL f1 -----
SF01      400.0322002 MHz
NUC1       13C
P1         10.00 usec
SI         65536
SF         400.0300135 MHz
WDW        EM
SSB        0
LB         0.00 Hz
GB         0
PC         1.00

```

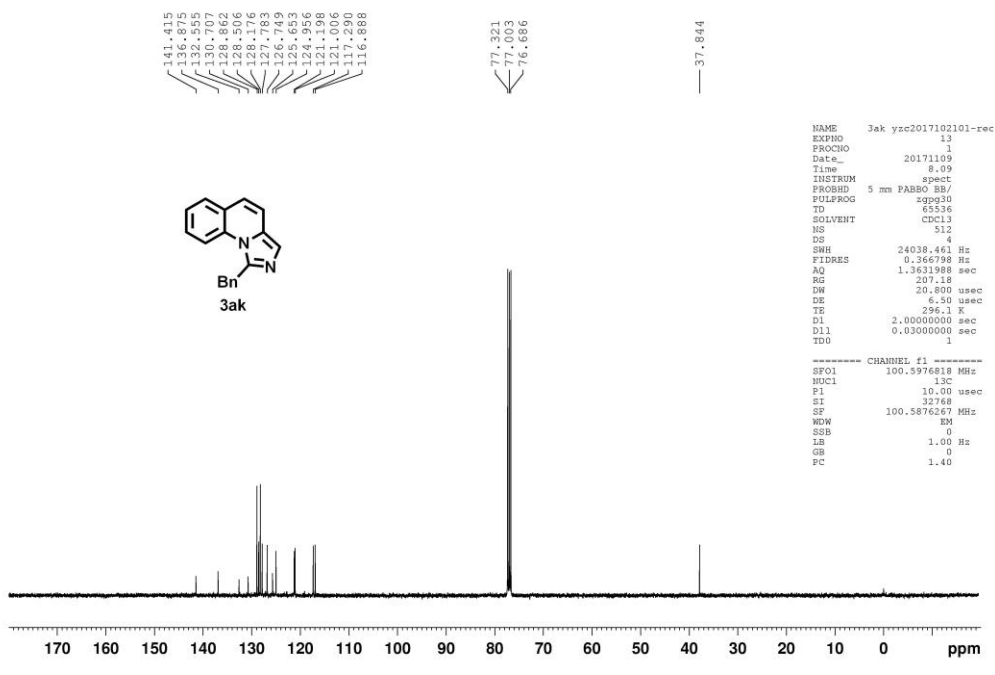

```

NAME      3ak yzc2017102101-rec
EXPNO     13
PROCNO    1
Date_     20171109
Time      8.09
INSTRUM   spect
PROBHD    5 mm PABBO BB/
PULPROG   zgpg30
TD         65536
SOLVENT   CDCl3
NS         512
DS         4
SWH        24038.461 Hz
FIDRES     0.366798 Hz
AQ         1.3611988 sec
RG         207.18
DW         20.800 usec
DE         6.50 usec
TE         296.1 K
D1         2.00000000 sec
D11        0.03000000 sec
TD0        1
----- CHANNEL f1 -----
SF01      100.5976818 MHz
NUC1       13C
P1         10.00 usec
SI         32768
SF         100.5876267 MHz
WDW        EM
SSB        0
LB         1.00 Hz
GB         0
PC         1.40

```

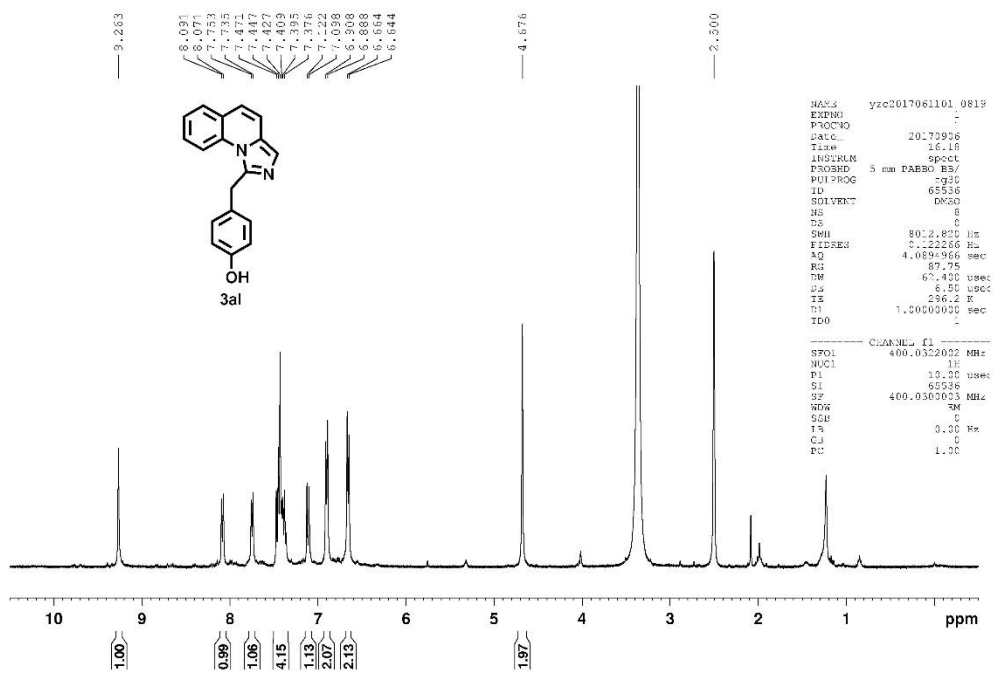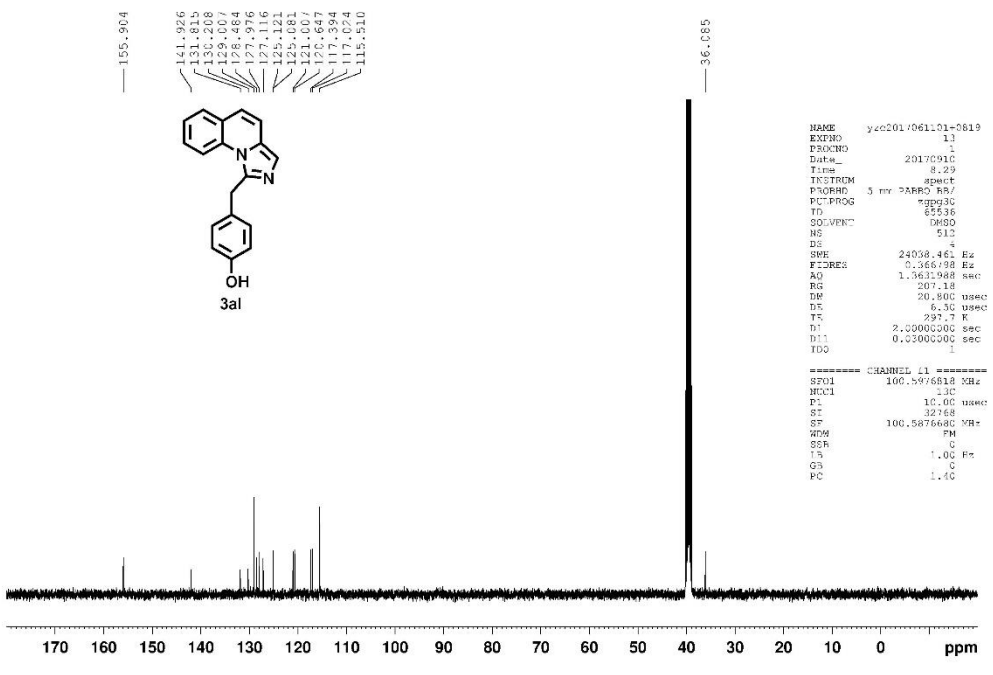

Supplement: c8ra03786h1.pdf [file c8ra03786h1.pdf]
